# 1      **Conservation and Convergence of Genetic Architecture in** 2                      **the Adaptive Radiation of *Anolis* lizards**

3  
4      **Joel W. McGlothlin,<sup>1,\*</sup> Megan E. Kobiela,<sup>2</sup> Helen V. Wright,<sup>3</sup> Jason J. Kolbe,<sup>4</sup> Jonathan B.**  
5      **Losos,<sup>5</sup> and Edmund D. Brodie III<sup>6</sup>**

6  
7      1. Department of Biological Sciences, Virginia Tech, Blacksburg, Virginia 24061; email:  
8              joelmcg@vt.edu

9      2. School of Biological Sciences, University of Nebraska, Lincoln, Nebraska 68588; email:  
10             mkobiela2@unl.edu

11     3. Computing Community Consortium, Computing Research Association, Washington, DC  
12             20036; email: helenvwright2@gmail.com

13     4. Department of Biological Sciences, University of Rhode Island, Kingston, Rhode Island  
14             02881; email: jjkolbe@uri.edu

15     5. Department of Biology, Washington University, Saint Louis, Missouri 63130; email:  
16             losos@wustl.edu

17     6. Department of Biology and Mountain Lake Biological Station, University of Virginia,  
18             Charlottesville, Virginia 22904; email: edb9j@virginia.edu

19     \* Corresponding author

20  
21     Short running title: *Conservation and Convergence of G*

22 ABSTRACT: The **G** matrix, which quantifies the genetic architecture of traits, is often viewed as an  
23 evolutionary constraint. However, **G** can evolve in response to selection and may also be viewed  
24 as a product of adaptive evolution. The evolution of similar **G** matrices in similar environments  
25 would suggest that **G** evolves adaptively, but it is difficult to disentangle such effects from  
26 phylogeny. Here, we use the adaptive radiation of *Anolis* lizards to ask whether convergence of **G**  
27 accompanies the repeated evolution of habitat specialists, or ecomorphs, across the Greater  
28 Antilles. We measured **G** in seven species representing three ecomorphs (trunk-crown, trunk-  
29 ground, and grass-bush). We found that the overall structure of **G** does not converge. Instead, the  
30 structure of **G** is well conserved and displays a phylogenetic signal. However, several elements of  
31 **G** showed signatures of convergence, indicating that some aspects of genetic architecture have  
32 been shaped by selection. Most notably, genetic correlations between limb traits and body traits  
33 were weaker in long-legged trunk-ground species, suggesting effects of recurrent selection on  
34 limb length. Our results demonstrate that common selection pressures may have subtle but  
35 consistent effects on the evolution of **G**, even as the overall pattern of genetic architecture  
36 remains conserved.

37

38 *Keywords:* adaptive radiation, *Anolis* lizards, constraint, **G** matrix, genetic correlation,  
39 quantitative genetics

## 40 **Introduction**

41 Genetic variation translates natural selection into evolutionary change (Falconer and MacKay  
42 1996; Roff 1997). Understanding the nature of such genetic variation and the processes that shape  
43 it has been a goal of evolutionary biology since the early days of population genetics  
44 (Dobzhansky 1937). In evolutionary quantitative genetics, the pattern of genetic variation in a  
45 population is described by the genetic variance-covariance matrix  $\mathbf{G}$ , which predicts the  
46 multivariate response to phenotypic selection (Lande 1979). The  $\mathbf{G}$  matrix can be used to make  
47 accurate predictions of short-term evolutionary change (Grant and Grant 1995), but its utility for  
48 making long-term predictions is more suspect because  $\mathbf{G}$  itself may evolve during adaptive  
49 evolution (Turelli 1988; Stepan et al. 2002). Although early theory argued for the stability of  $\mathbf{G}$   
50 (Lande 1980), both more recent theoretical (Agrawal et al. 2001; Jones et al. 2003; 2004, 2012,  
51 2014; Revell 2007; Arnold et al. 2008) and empirical results (Stepan et al. 2002; Cano et al.  
52 2004; Doroszuk et al. 2008; Hine et al. 2009; Eroukhmanoff and Svensson 2011; Björklund et al.  
53 2013; Careau et al. 2015) suggest that  $\mathbf{G}$  can and does evolve, sometimes rapidly. Given enough  
54 time, selection is expected to align  $\mathbf{G}$  with the adaptive landscape (Cheverud 1984; Arnold et al.  
55 2001, 2008; Jones et al. 2003, 2014; Revell 2007), potentially making  $\mathbf{G}$  as much as a product of  
56 adaptive evolution as a constraint upon it (Merilä and Björklund 2004).

57 Because stability and evolutionary lability of  $\mathbf{G}$  are both plausible theoretical outcomes,  
58 the relative importance of history and adaptation in shaping  $\mathbf{G}$  is largely an empirical question  
59 (Arnold et al. 2008). Several studies have shown a relationship between the shape of  $\mathbf{G}$  and  
60 divergence, suggesting the importance of genetic constraints in channeling evolutionary  
61 outcomes (Bégin and Roff 2003; 2004; Blows and Hoffmann 2005; McGuigan et al. 2005;

62 McGuigan 2006; Hansen and Houle 2008; Walsh and Blows 2009; Chenoweth et al. 2010;  
63 Bolstad et al. 2014; Houle et al. 2017; McGlothlin et al. 2018; Walter et al. 2018). The early  
64 stages of adaptive radiation are expected to be aligned with the “genetic line of least resistance”  
65 describing the direction of greatest genetic variation within a population (Schluter 1996).  
66 Although natural selection should be able to push phenotypes away from this line given enough  
67 time, recent results suggest that evolutionary change may be predicted by axes of genetic  
68 variation for tens of millions of years (Houle et al. 2017; McGlothlin et al. 2018). Conversely, it  
69 is well established that both directional and nonlinear selection may alter aspects of **G**. For  
70 example, correlational selection, which occurs when certain combinations of traits are favored  
71 over others, can directly alter the strength of genetic correlations each generation (Phillips and  
72 Arnold 1989; Jones et al. 2003; Revell 2007). Patterns of genetic correlation are often congruent  
73 with axes of correlational selection in the wild (Brodie 1989; 1992; McGlothlin et al. 2005; Roff  
74 and Fairbairn 2012), and genetic correlations can evolve in response to artificial correlational  
75 selection (Delph et al. 2011; Steven et al. 2020).

76         Although comparative studies of **G** have become more common in recent years (Steppan  
77 et al. 2002; Bégin and Roff 2003; Hine et al. 2009; Eroukhmanoff and Svensson 2011; Walter et  
78 al. 2018), none have been able to disentangle the effects of shared ancestry from similar selection  
79 pressures in determining the evolution of **G**. Convergent evolution of **G** or its elements in similar  
80 environments would provide strong evidence that changes in **G** represent adaptation of genetic  
81 architecture (Losos 2011). The adaptive radiation of West Indian *Anolis* lizards provides an ideal  
82 testing ground for hypotheses about the evolution of **G** because the effects of phylogenetic  
83 history and ecological selection are largely decoupled (Losos 1994; 2009; 2011). In the Greater  
84 Antilles, anoles have diversified into 120 species, 95 of which can be classified as one of six

85 habitat specialists, or ecomorphs, each of which has evolved multiple times throughout the *Anolis*  
86 radiation (Williams 1972; Losos et al. 1998; Beuttell and Losos 1999; Losos 2009). Species with  
87 dissimilar morphology on the same island tend to be more closely related than are those with  
88 similar morphology on different islands, indicating that the characteristic morphology of  
89 ecomorphs is due to convergent evolution (Losos et al. 1998; Harmon et al. 2005; Mahler et al.  
90 2013). This repeated adaptive radiation leads to explicit predictions for the evolution of **G**. If **G**  
91 responds predictably to similar selection pressures, **G** should show signatures of convergence  
92 among the independent origins of the same ecomorph. Conversely, if **G** evolves relatively slowly  
93 and does not respond predictably to similar selection pressures, **G** or its elements should be more  
94 similar within lineages than within ecomorph classes.

95       Previous work in *Anolis* using phenotypic variance-covariance matrices (**P**) as proxies for  
96 **G** (Cheverud 1988) suggests that selection may indeed lead to convergence in (co)variance  
97 structure. A study comparing **P** in eight *Anolis* species showed significant variation in covariance  
98 structure across the radiation and demonstrated convergent changes in **P** in three distantly related  
99 species from the same ecomorph class (Kolbe et al. 2011). In a separate study, **P** showed  
100 significant alignment with the matrix of nonlinear selection ( $\gamma$ ) in *A. cristatellus*, suggesting that  
101 contemporary stabilizing and correlational selection may act to shape the pattern of phenotypic  
102 (co)variance within species (Revell et al. 2010). These results suggest that selection plays a role  
103 in shaping genetic architecture in anoles, but patterns of phenotypic covariance do not necessarily  
104 mirror patterns of genetic covariance (Hadfield et al. 2007). Thus, comparative studies that  
105 directly estimate **G** are necessary to test whether its structure is more influenced by phylogenetic  
106 history or convergent evolution.

107           In this study, we compare **G** matrices in seven *Anolis* species reared in a controlled  
108 laboratory environment. We chose species from lineages originating on three different islands,  
109 Puerto Rico, Jamaica, and Cuba, and included three ecomorphs, trunk-crown (three species),  
110 trunk-ground (three species), and grass-bush (one species), which are distinguished by their  
111 habitat use, coloration, and skeletal morphology (Williams 1972; Beuttell and Losos 1999;  
112 Harmon et al. 2005; Losos 2009). Trunk-crown lizards are typically found high in trees and are  
113 usually green with relatively short legs for climbing and clinging to narrow perches. Trunk-  
114 ground lizards tend to be found on low perches or on the ground and are typically brown with  
115 long hindlimbs that aid in running quickly and jumping far (Losos and Sinervo 1989; Losos  
116 1990; Irschick and Losos 1998; Beuttell and Losos 1999). The third ecomorph, grass-bush, has a  
117 slender body that matches its narrow perches and long hindlimbs that allow it to both run and  
118 jump well (Losos 1990; Beuttell and Losos 1999). The three trunk-crown species are distantly  
119 related to one another, as are the trunk-ground species. Both ecomorphs may have evolved three  
120 separate times, although it cannot be ruled out that one of these ecomorphs represents the  
121 ancestral state for the anole radiation (Losos 2009). Because of the importance of skeletal  
122 morphology, and limb length in particular, to the evolution of these ecomorphs, our estimates of  
123 **G** focus on skeletal traits.

124           Our previous results have shown that **G** varies substantially across these *Anolis* species,  
125 while retaining conserved axes of genetic variation (McGlothlin et al. 2018). Specifically, **G**  
126 matrices varied most in size (overall genetic variance), and the major axis of genetic variance  
127 remained similar in orientation across all species. This major axis of genetic variance was similar  
128 in orientation to the major axis of morphological divergence, suggesting that divergence has  
129 occurred along a genetic line of least resistance even though **G** has not remained constant. The

130 largest evolutionary changes in  $\mathbf{G}$  were also aligned with the major axes of both genetic variance  
131 and morphological divergence. This triple alignment may have been caused by deep genetic  
132 constraints underlying both the evolution of  $\mathbf{G}$  and morphological divergence, alignment of  $\mathbf{G}$   
133 with the adaptive landscape, genetic drift, or some combination of the three (McGlothlin et al.  
134 2018).

135 Here, we explicitly consider the role of selection in shaping  $\mathbf{G}$ -matrix evolution across the  
136 *Anolis* radiation by testing whether aspects of  $\mathbf{G}$  show patterns of convergence that mirror the  
137 repeated evolution of ecomorphs. To do so, we use two types of comparisons. First, we test for  
138 convergence of the overall structure of  $\mathbf{G}$  by asking whether random skewers correlations, which  
139 are estimates of pairwise similarity in the predicted multivariate response to selection, are better  
140 predicted by shared evolutionary history or shared ecology. Second, we conduct similar tests for  
141 individual elements of  $\mathbf{G}$  (i.e., variances and covariances of individual traits) to test for signatures  
142 of convergence on a finer scale. Although many processes, including both selection and drift,  
143 could lead to similarities in  $\mathbf{G}$  among more closely related species, convergence in the structure  
144 of  $\mathbf{G}$  among distantly related species of the same ecomorph would provide strong evidence that  $\mathbf{G}$   
145 may be predictably shaped by common selection pressures.

146

147

148

## Methods

149

### *Estimation of $\mathbf{G}$*

150 Detailed methods for estimation of the  $\mathbf{G}$  matrices used here are reported elsewhere (McGlothlin  
151 et al. 2018). Briefly, adults from seven *Anolis* species, representing independent origins of trunk-

152 crown (*A. evermanni*, Puerto Rico; *A. grahmi*, Jamaica; *A. smaragdinus*, a Bahamian species  
153 descended from *A. porcatus* on Cuba), trunk-ground (*A. cristatellus*, Puerto Rico; *A. lineatopus*,  
154 Jamaica; *A. sagrei*, Cuba), and grass-bush ecomorphs (*A. pulchellus*, Puerto Rico), were collected  
155 from the wild (Fig. 1). Due to travel restrictions, species from Cuban lineages were collected  
156 from South Bimini, The Bahamas, where they occur naturally. These seven species shared a  
157 common ancestor approximately 41.5–43.5 million years ago, and the most recent phylogenetic  
158 split (between *A. cristatellus* and *A. pulchellus*) dates is estimated at 19.8–22.5 million years ago  
159 (fig. 1, Zheng and Wiens 2016; Poe et al. 2017).

160         Adults were housed in individual cages in the laboratory except when paired for breeding  
161 and held at controlled photoperiod (12L:12D for Puerto Rican and Jamaican adults and 13L:11D  
162 for Bahamian adults), temperature (28°C during the day and 25°C at night), and relative humidity  
163 (65%). Lizards were provided with a perch, a mesh hammock for basking near an adjacent UVB  
164 bulb, and a carpet substrate. Adults were mated in a paternal half-sib breeding design (average of  
165 47 sires and 69 dams per species) to produce offspring (2,904 total, see McGlothlin et al. 2018  
166 for more sampling details). Laying females were provided with potted plants, which were  
167 checked weekly for eggs, which were placed in individual cups with a 1:1 mixture of water and  
168 vermiculite and held in an incubator at 28°C and 80% humidity until hatching.

169         Juveniles were reared in individual cages until 6 months of age and were provided with  
170 crickets and water daily. At 0, 1, 3, and 6 months of age, we X-rayed juveniles by chilling them  
171 for 10 min at 5°C in small plastic bags. The bags were then secured with masking tape to a film  
172 cartridge (Kodak Biomax XAR) for imaging in a Faxitron 43805N radiography system.  
173 Developed radiographs were digitized using a flatbed scanner. Using ImageJ (NIH), we measured  
174 snout-vent length (SVL) and eight other skeletal traits, jaw length (JL), head width (HW),



175 pectoral width (PECT), pelvis width (PELV), humerus (HUM), ulna (UL), femur (FEM), and  
176 tibia (TIB; see Fig. 1A for location of measured traits). In all, 9,369 individual X-ray images  
177 were measured (McGlothlin et al. 2018). We used multivariate repeated measures animal models  
178 in ASReml 3.0 (Gilmour et al. 2009) to estimate **G** matrices for natural-log transformed traits,  
179 with size (natural-log SVL) as a covariate to correct for age and growth. These models included  
180 two random animal effects, one linked to the pedigree to estimate additive genetic (co)variance  
181 and a second unlinked effect to estimate effects of permanent environment. All species could not  
182 be reliably sexed as juveniles; therefore, we did not correct for sex in our models. In one species  
183 that has been studied extensively in the laboratory, *A. sagrei*, sexual size dimorphism is not  
184 noticeable at hatching and only becomes elaborated after 6 months of age with the maturation of  
185 testes in males (Cox et al. 2017). Genetic correlations are shown (along with heritabilities) in  
186 table A1 and visualized in fig. 1; full **G** matrices, reprinted from McGlothlin et al. (2018), are  
187 also shown in table A1. Permanent environment (co)variances, which were generally at least an  
188 order of magnitude smaller than genetic (co)variances, and residual (co)variances are not  
189 presented here but were used in the calculation of total phenotypic variance for calculating  
190 heritabilities. As reported previously, in all but two species, all eight traits we measured were  
191 significantly heritable (mean  $h^2$  across species  $\pm$  s.d.: JL,  $.40 \pm .150$ ; HW,  $.22 \pm .084$ ; PECT,  $.21$   
192  $\pm .073$ ; PELV,  $.22 \pm .046$ ; HUM,  $.16 \pm .047$ ; UL,  $.15 \pm .042$ ; FEM,  $.45 \pm .143$ , TIB,  $.54 \pm .091$ ,  
193 table A1; McGlothlin et al. 2018). In general, genetic correlations were strong and positive for  
194 pairs of limb traits and both weaker and more variable across species for other trait combinations  
195 (fig. 1, table A1; McGlothlin et al. 2018).

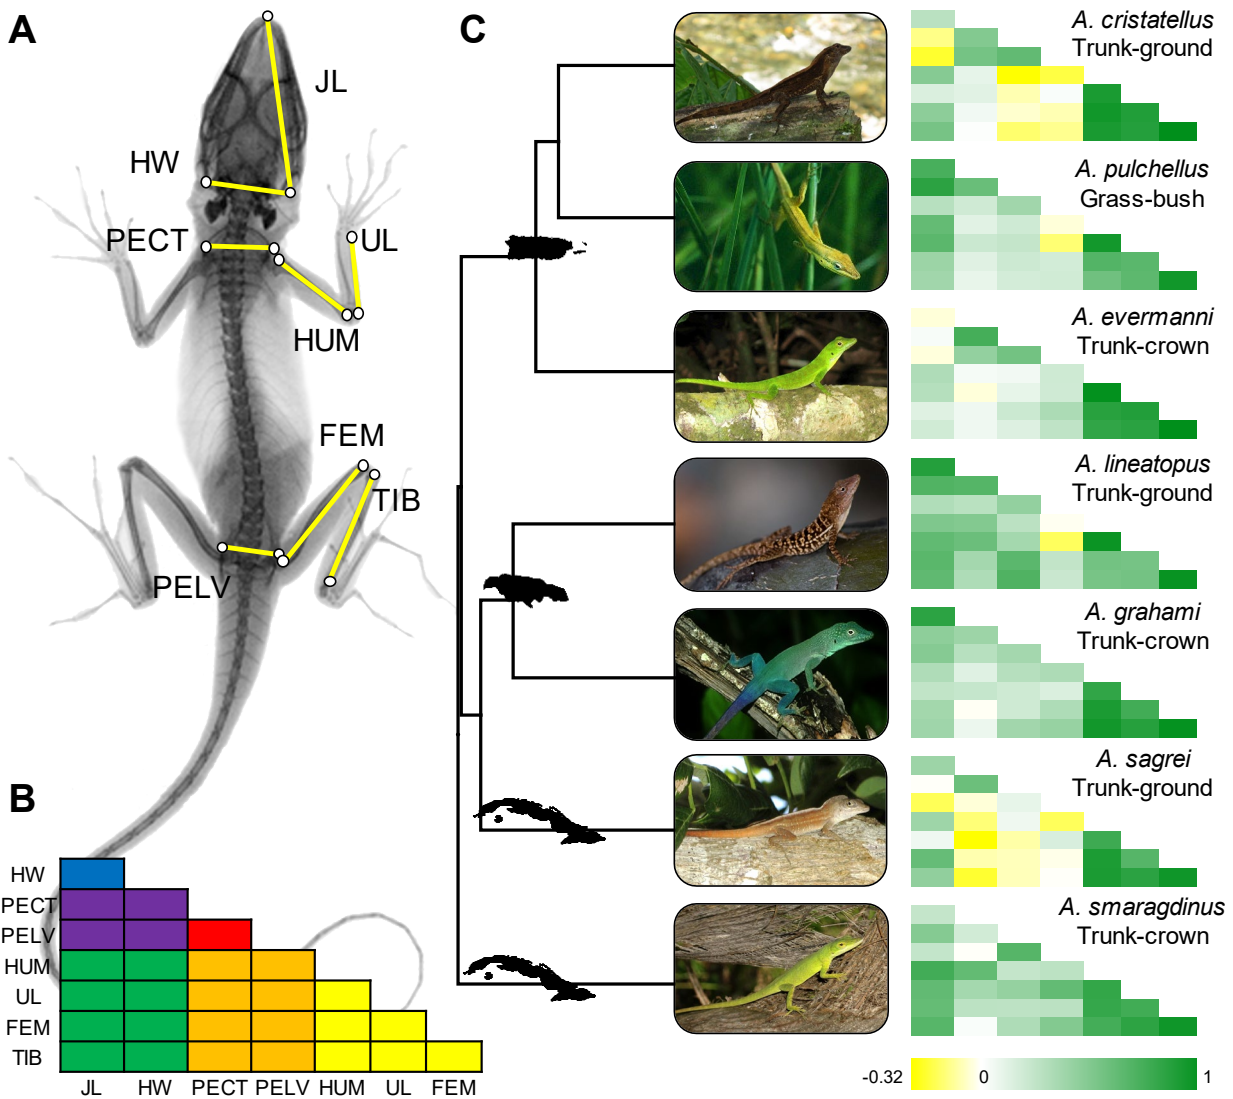

**Figure 1:** (A) Traits measured in this study: JL = jaw length, HW = head width, PECT = pectoral width, PELV = pelvis width, HUM = humerus, UL = ulna, FEM = femur, TIB = tibia. (B) Schematic of a genetic correlation matrix showing the location of each trait. Elements are color-coded based on morphological modules (head, body, and limbs; see Methods), showing within-module correlations in primary colors (blue = head, red = body, yellow = limbs) and between module correlations in secondary colors (violet = head-body, green = head-limb, orange = body-limb). (C) Graphical representation of genetic correlation matrices for each species. Positive correlations are shown in green and negative correlations are shown in yellow, with brighter colors signifying stronger correlations. See table A1 for values. Photographs by J.B.L. (*A. pulchellus*, *A. lineatopus*, and *A. grahami*), and E.D.B. III (all other species).

196

### *Statistical Analyses*

197 All statistical analyses using  $\mathbf{G}$  matrices were performed in R 3.5.3 (R Core Team 2019). To  
198 incorporate estimation error in  $\mathbf{G}$  into our analyses, we used the restricted maximum-likelihood  
199 multivariate normal (REML-MVN) method developed by Houle and Meyer (2015). We used  
200 point estimates of  $\mathbf{G}$  and the sampling (co)variance matrix of (co)variance components, which is  
201 calculated by ASReml as the inverse of the average information matrix (Gilmour et al. 2009), to  
202 define a multivariate normal distribution. From this distribution, we generated 10,000 samples of  
203  $\mathbf{G}$  for each species using the function *rmvn* from the R package *mgcv* (Wood 2012). All further  
204 analyses were run using both the point estimates of  $\mathbf{G}$ , from which we estimated parameters and  
205 test statistics, and the set of 10,000 REML-MVN samples per species, from which we calculated  
206 95% confidence intervals using the 2.5% and 97.5% quantiles from the parameter distribution. A  
207 parameter was considered to be statistically supported when its 95% confidence interval did not  
208 overlap the expected null value (often zero). We clarify the specific ways REML-MVN samples  
209 were used for each analysis below.

210 To quantify pairwise similarity in the overall structure of  $\mathbf{G}$ , we used random skewers  
211 analysis, which compares the response to selection predicted by a pair of  $\mathbf{G}$  matrices (Marroig  
212 and Cheverud 2001; Cheverud and Marroig 2007; Revell 2007; Aguirre et al. 2014). Random  
213 skewers analysis has the advantage of providing an evolutionarily relevant comparison of  $\mathbf{G}$   
214 using a single metric. We used the function *RandomSkewers* in the R package *evolQG* (Melo et  
215 al. 2015) to apply 10,000 random selection gradients ( $\beta$ ) to all seven  $\mathbf{G}$  matrices. Each element of  
216 these skewers was drawn from a normal distribution, after which each skewer was normalized to  
217 unit length and used to calculate the predicted multivariate selection response ( $\Delta\bar{z}$ ) from the

218 multivariate breeder's equation,  $\Delta\bar{\mathbf{z}} = \mathbf{G}\boldsymbol{\beta}$  (Lande 1979). The correlation in response to selection  
219 for two species, or the random skewers correlation ( $r_{RS}$ ), was calculated as the pairwise vector  
220 correlation of the resultant 10,000 estimates of  $\Delta\bar{\mathbf{z}}$ . To incorporate estimation error,  $r_{RS}$  was  
221 recalculated for 10,000 sets of seven  $\mathbf{G}$  matrices each using our REML-MVN samples. We report  
222 the mean and 95% confidence intervals of this distribution in addition to our point estimate.  
223 Incorporating error pairs of  $\mathbf{G}$  matrices leads to negatively skewed distributions of the REML-  
224 MVN estimates of  $r_{RS}$ . Thus, means of the REML-MVN estimates of  $r_{RS}$  tend to be lower than  
225 the point estimates.

226 To determine whether more closely related species had more similar  $\mathbf{G}$  matrices, we used  
227 a Mantel test to compare a matrix of  $r_{RS}$  to a patristic distance matrix, which was calculated using  
228 a tree pruned from a dated squamate phylogeny (Zheng and Wiens 2016); dates from a tree of all  
229 *Anolis* species (Poe et al. 2017), which had identical topology for our species, were similar.  
230 Although Mantel tests are not useful for comparing (co)variance matrices directly (Steppan et al.  
231 2002) and are not recommended for use in the phylogenetic comparative method when they can  
232 be avoided, they are the only option when comparative analyses involve data that can only be  
233 expressed as either a correlation or a distance between species (Harmon and Glor 2010). A  
234 negative Mantel correlation ( $r_M < 0$ ) between  $r_{RS}$  and patristic distance would indicate that the  
235 similarity in the structure of  $\mathbf{G}$  is explained by phylogenetic similarity. To determine whether  
236 unrelated species of the same ecomorph displayed convergence in the structure of  $\mathbf{G}$ , we  
237 generated a matrix consisting of zeros (different ecomorph) and ones (same ecomorph) and  
238 compared it to a matrix of  $r_{RS}$  using a partial Mantel test that used the patristic distance matrix as  
239 the control matrix. The single grass-bush species, *A. pulchellus*, was excluded from this and all

240 other analyses that included an ecomorph effect. A positive correlation ( $r_M < 0$ ) between the  $r_{RS}$   
241 matrix and the ecomorph matrix would indicate convergence.

242 Mantel correlations were calculated in R using the base function `corr` (simple Mantel test)  
243 or the function `pcor` (partial Mantel test) from the package `ppcor` (Kim 2015). We did not perform  
244 permutation tests to assess statistical significance as is the typical practice when performing  
245 Mantel tests. Rather, we conducted separate Mantel tests for each of 10,000 sets of  $r_{RS}$  matrices  
246 calculated using our REML-MVN samples and report the mean and 95% confidence intervals of  
247 this distribution.

248 Evolutionary patterns in  $\mathbf{G}$  may involve changes that are subtler than can be detected in  
249 analyses of its overall structure. Therefore, we also tested for the effects of shared evolutionary  
250 history and shared ecology on the individual elements of  $\mathbf{G}$ . We compared genetic variances  
251 (diagonal elements of  $\mathbf{G}$ ) and genetic correlations (off-diagonal elements of  $\mathbf{G}$  standardized by  
252 the square root of the product of the variances) across  $\mathbf{G}$  matrices, testing for both phylogenetic  
253 signal and differences between ecomorphs (trunk-crown vs. trunk-ground). We present  
254 comparisons of genetic correlations rather than genetic covariances so that tests for associations  
255 between traits would be independent of differences in variance across species. However, we note  
256 that analyses using covariances gave nearly identical results (not shown).

257 To test for the effects of shared evolutionary history, we used Blomberg's  $K$  as an  
258 estimate of phylogenetic signal (Blomberg et al. 2003; implemented in the R package `phytools`,  
259 Revell 2012). Values of  $K = 1$  indicate phylogenetic signal consistent with a Brownian motion  
260 model of evolution. Values of  $K < 1$  indicate weaker phylogenetic signal, and  $K > 1$  indicate  
261 stronger signal than would be predicted from a Brownian motion model. We tested for effects of  
262 shared ecology on genetic variance and genetic correlations using phylogenetic generalized least

263 squares (Martins and Hansen 1997) with ecomorph as a predictor (coding trunk-crown as 0 and  
264 trunk-ground as 1; *A. pulchellus* was excluded), our dated tree, and an assumption of Brownian  
265 motion evolution (implemented in the R package APE, Paradis et al. 2004). Alternative models  
266 that assumed an Ornstein-Uhlenbeck evolutionary model provided similar results (not shown).  
267 For each test, we report the evolutionary correlation ( $r_e$ ) between the element of  $\mathbf{G}$  and ecomorph  
268 to remove effects of scale. For a given element of  $\mathbf{G}$ ,  $r_e > 0$  indicates a larger value for trunk-  
269 ground species, and  $r_e < 0$  indicates a larger value for trunk-crown species. Both of these analyses  
270 were conducted for both our point estimates and our REML-MVN samples to incorporate  
271 estimation error. Using the 95% confidence intervals from the distributions of REML-MVN  
272 estimates, we note deviations from both  $K = 0$  and  $K = 1$  for phylogenetic signal and  $r_e = 0$  for the  
273 evolutionary correlation.

274 For visualization, we grouped our estimates of phylogenetic signal and evolutionary  
275 correlation into six groups based on phenotypic module. Three groups consisted of elements of  $\mathbf{G}$   
276 within modules, head (JW, HL), body (PECT, PELV), and limbs (HUM, UL, FEM, and TIB),  
277 and three contained elements of  $\mathbf{G}$  between modules, head-limb, head-body, and body-limb.

278

279

280

## Results

281

### *Overall Structure of $\mathbf{G}$*

282

283

284

Predicted responses to selection were highly correlated between all pairs of species (mean  $r_{RS} =$   
.84, range .75 – .92, REML-MVN mean  $r_{RS} = 0.73$ , range 0.61 – 0.86; table A2, fig. 2),  
suggesting that the species have  $\mathbf{G}$  matrices with similar overall structure despite being separated

285 for 20–44 million years. **G**-matrix similarity was negatively correlated with phylogenetic distance  
286 ( $r_M = -.44$ ; REML-MVN estimate:  $r_M$  [95% CI] =  $-.41$  [ $-.59, -.15$ ]), indicating that closely related  
287 species have **G** matrices that predict a more similar evolutionary response. More distantly related  
288 pairs of species also displayed more variable values of  $r_{RS}$ , with some distantly related pairs of  
289 species showing highly similar **G** matrices and others showing highly dissimilar **G** (fig. 2).  
290 Overall similarity of **G** was not predicted by ecomorph ( $r_M = -.12$ ; REML-MVN estimate:  $r_M$   
291 [95% CI] =  $.04$  [ $-.22, .32$ ]). However, the two distantly related trunk-ground species *A.*  
292 *cratatellus* and *A. sagrei* did have highly similar **G** matrices (figs. 2 & 3).

293

### 294 *Individual Elements of G*

295 All individual elements of **G** showed phylogenetic signal significantly higher than  $K = 0$  but  
296 indistinguishable from  $K = 1$ , which is the null expectation of the Brownian motion model (mean  
297  $K = .91$ , REML-MVN mean  $K = .94$ ; fig. 4A, table A3). Phylogenetic signal did not exhibit any  
298 detectable patterns across trait groups (fig. 4A).

299 Six elements of **G** differed significantly between trunk-crown and trunk-ground  
300 ecomorphs. Specifically, genetic correlations between pelvis width and both jaw length and all  
301 four limb bones were significantly lower in trunk-ground species than in trunk-crown species  
302 (fig. 4B; table A4). In addition, genetic correlations between jaw length and femur length were  
303 higher in trunk-ground species than in trunk-crown species (fig. 4B; table A4). In some cases,  
304 these effects involved changes in the sign of genetic correlations from positive in trunk-crown  
305 species to negative in trunk-ground species (fig. 1). Although not a statistically significant effect,  
306 genetic correlations both among limb bones and between pectoral width and all four limb bones



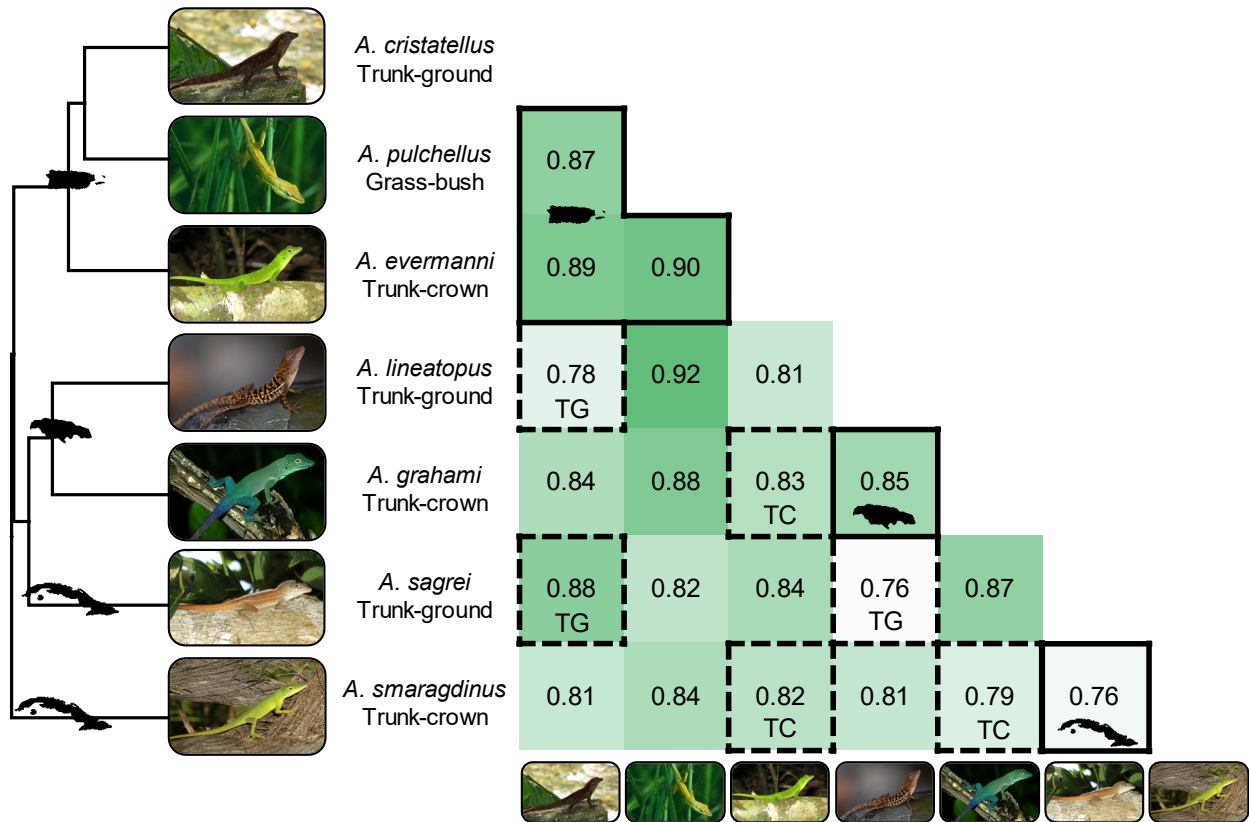

**Figure 2:** Correlations between species in the overall structure of the **G** matrix as measured via random skewers correlations ( $r_{RS}$ ). Stronger correlations are represented by darker shading. Within-island comparisons are shown with a solid border, and within-ecomorph comparisons are shown with a dashed border (TC = trunk-crown, TG = trunk-ground). Islands of origin are represented by their shapes on the phylogeny (Puerto Rico, Jamaica, and Cuba, from top to bottom) and for the three within-island comparisons. Note that despite originating on Cuba, *A. sagrei* is actually more closely related to Jamaican species than to *A. smaragdinus*. The phylogeny is pruned from a dated tree of squamates (Zheng and Wiens 2016).



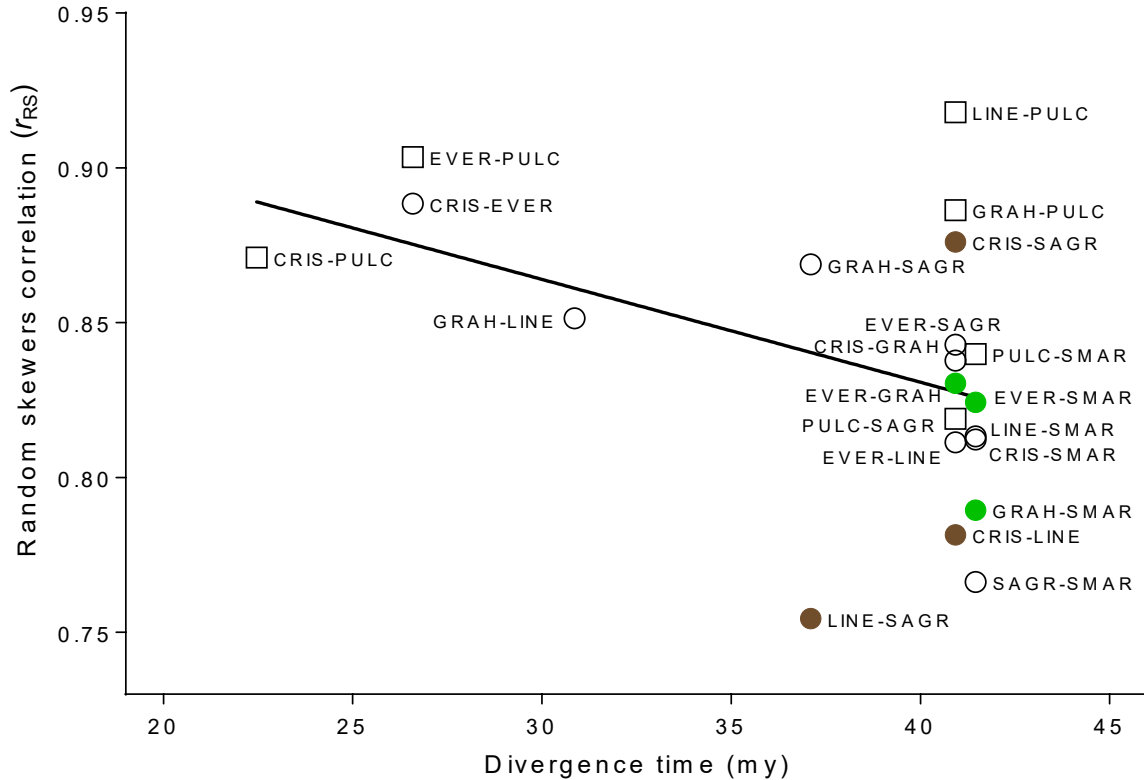

**Figure 3:** Relationship between divergence time (millions of years, my) and random skewers correlations ( $r_{RS}$ ). **G** matrices of more distantly related species are significantly less similar and more variable in  $r_{RS}$ . Within-ecomorph comparisons are shown as colored circles (green = trunk-crown and brown = trunk-ground), with trunk-crown/trunk-ground comparisons as open circles and comparisons with the grass-bush species as open squares. Each point is labeled with four letter codes for the two species under comparison (CRIS = *A. cristatellus*, EVER = *A. evermanni*, GRAH = *A. grahami*, LINE = *A. lineatopus*, PULC = *A. pulchellus*, SAGR = *A. sagrei*, SMAR = *A. smaragdinus*). A line of best fit from a least-squares regression is added for visualization.

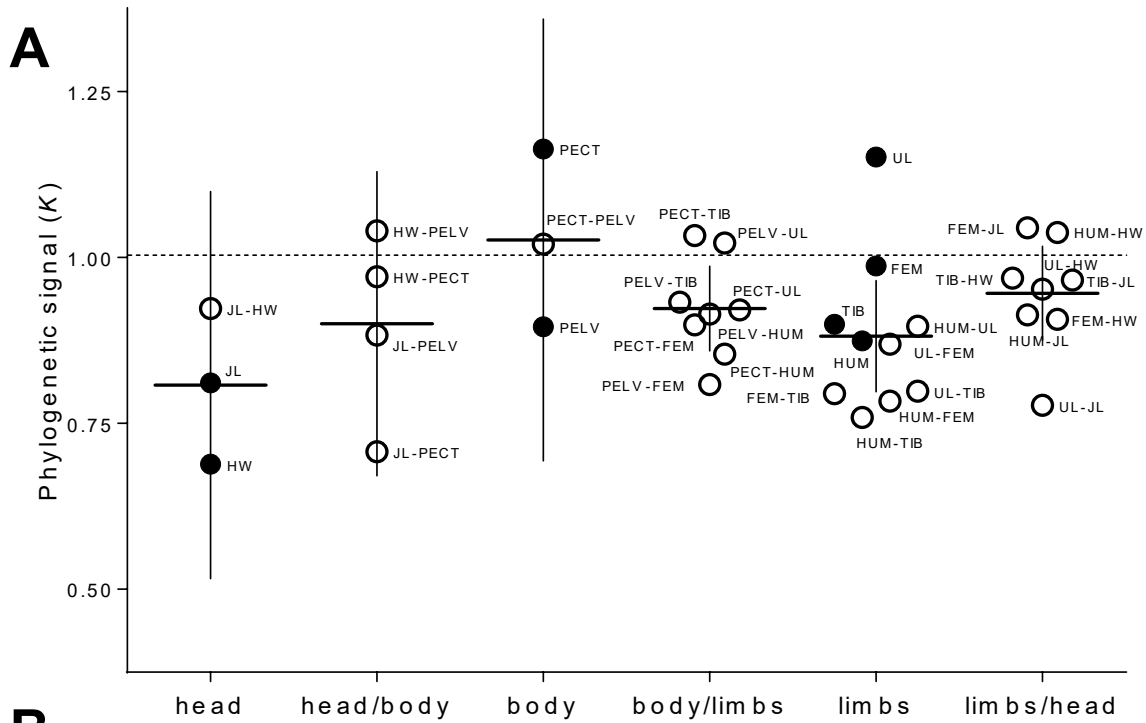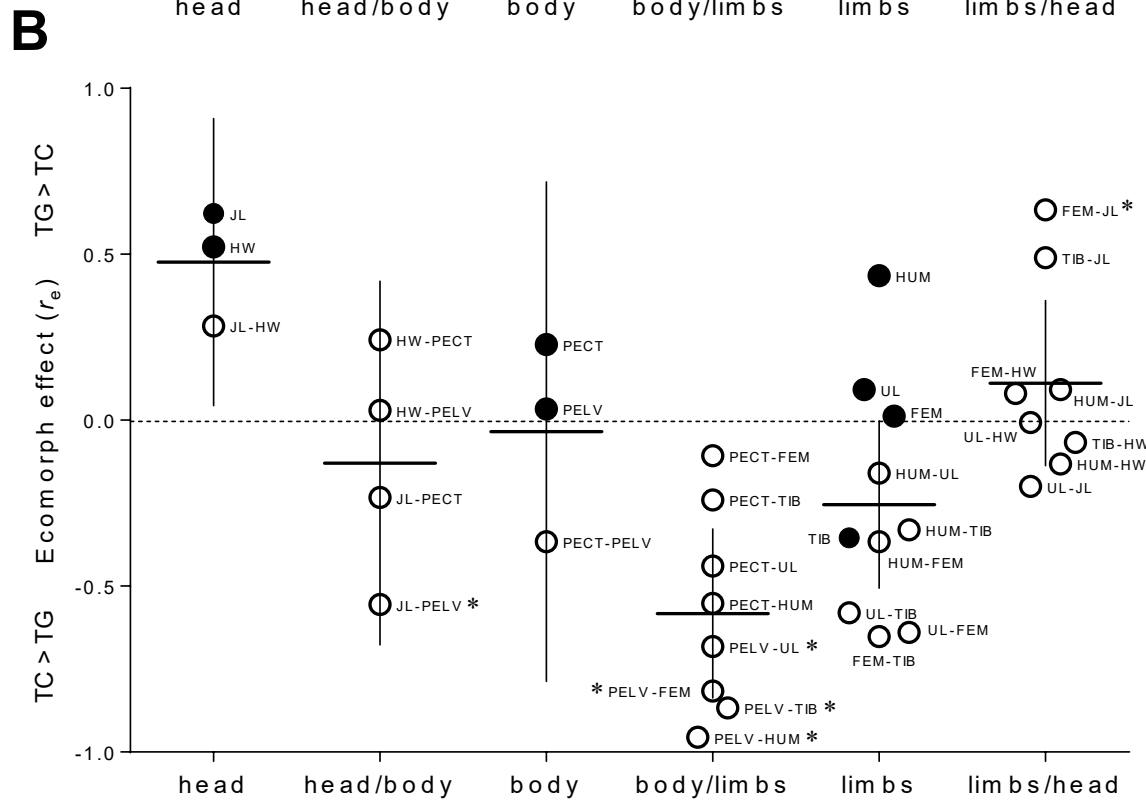

**Figure 4** (previous page): Element-by-element comparisons of genetic variances (solid circles) and correlations (open circles). Elements are split into three within-module groups (head, body, and limbs) and three between-module groups (head/body, body/limb, and limb/head) and are labeled with abbreviations as in Fig. 1. Bars show means and 95% confidence intervals for a set of point estimates within a group and are presented for visualization purposes only. (A) Strength of phylogenetic signal, as estimated using Blomberg's  $K$ . Estimates were clustered around  $K = 1$ , suggesting phylogenetic signal consistent with Brownian motion. (B) Ecomorph effects from phylogenetic least squares, given as the evolutionary correlation ( $r_e$ ). Points above the midline indicate that trunk-ground species had higher values of a given element of  $\mathbf{G}$  than did trunk-crown species; the converse is true below the midline. Six genetic correlations showed a significant correlation with ecomorph (trunk-ground vs. trunk-crown;  $p < .05$ , denoted by \*).

307 tended to be weaker in trunk-ground species than in trunk-crown species, indicating a trend  
308 toward weaker integration among limb and body traits in trunk-ground species.

309         Although we did not conduct formal tests for the lone grass-bush species, *A. pulchellus*,  
310 inspecting its genetic correlation matrix (fig. 1, table A1) shows that this species displays some  
311 similarities to trunk-ground lizards. In particular, this species had weak (and occasionally  
312 negative) genetic correlations between the pelvis and all limb bones, similar to all trunk-ground  
313 species. *A. pulchellus* also showed genetic correlations between hindlimb and forelimb bones that  
314 were noticeably weaker than the other two species in the Puerto Rican lineage (fig. 1, table A1).

315

316

317

## Discussion

318 Here we present two significant findings about the evolution of quantitative genetic architecture  
319 within the adaptive radiation of West Indian *Anolis* lizards. First, when viewed in terms of its

320 effects on multivariate response to selection, we show that the overall structure of the *Anolis* **G**  
321 matrix retains a phylogenetic signal. Although the seven species we studied have been separated  
322 for 20–44 million years, all **G** matrices predicted a very similar multivariate evolutionary  
323 response, and more closely related species had more similar **G** matrices. Second, despite this  
324 phylogenetic signal in the overall structure of **G**, pairwise genetic correlations between limb traits  
325 and body traits showed consistent signatures of convergence, suggesting that they have been  
326 adaptively shaped by similar selection pressures resulting from each ecomorph's niche. In  
327 particular, longer-limbed trunk-ground lizards show a decoupling of limb length and pelvis width  
328 relative to shorter-limbed trunk-crown lizards, demonstrating that convergent changes in genetic  
329 architecture may accompany repeated morphological adaptation. Taken together, our results  
330 show that selection may alter **G** in predictable and evolutionarily consequential ways without  
331 leading to major changes in its overall structure.

332         From the perspective of overall multivariate response to selection, **G** is remarkably  
333 similar across the *Anolis* radiation, with predicted responses to selection in random directions  
334 showing strong positive correlations ranging from .76 to .92. Over the span of a few generations,  
335 then, morphological divergence of species with the **G** matrices estimated here should be  
336 constrained to lie along directions defined by quantitative genetic architecture. Indeed, previous  
337 work has shown that divergence of these species remains aligned with the major axis of genetic  
338 variation,  $\mathbf{g}_{\max}$ , even after ~44 million years of divergence (McGlothlin et al. 2018).

339         The similarity of the overall structure of **G** declined with greater phylogenetic distance.  
340 This pattern suggests that the overall structure of **G** changes relatively slowly, remaining  
341 conserved over millions of years. While similarity of **G** in closely related species may in part  
342 reflect comparable patterns of contemporary selection in species in the same lineage, most

343 similarity is likely attributable to shared evolutionary history. In addition to this phylogenetic  
344 trend, we found that more distantly related species also show greater variance in random skewers  
345 correlations. Although many distantly related species have dissimilar **G** matrices, some pairs  
346 have highly congruent **G**, a pattern that is not explained by convergent morphology. This  
347 increased variance emphasizes the unpredictability of the evolution of **G** structure over longer  
348 timescales.

349         When considering more subtle changes in **G**—shifts in trait-specific genetic variances and  
350 correlations—we found evidence that **G** can change repeatedly and predictably in response to  
351 similar selection pressures. The strongest convergence occurred in genetic correlations between  
352 limb bones and pelvis width, which were significantly reduced in trunk-ground species relative to  
353 trunk-crown species. In some cases, genetic correlations differed in sign between ecomorphs.  
354 When this was the case, genetic correlations were usually negative in trunk-ground species and  
355 positive in trunk-crown species. These results indicate that the pattern of genetic integration was  
356 subtly remodeled in the transition from trunk-crown to trunk-ground ecomorphs (or vice versa),  
357 most notably in the relationship between limb length and pelvis width, for which trunk-ground  
358 species showed weaker genetic correlations when compared to trunk-crown species.

359         The ecomorph difference in the genetic correlations between limb length and pelvis width  
360 is likely to result from a combination of directional selection and correlational selection acting on  
361 these traits. Ecomorph differences in limb length have clear links to performance within their  
362 characteristic habitats (Losos and Sinervo 1989; Losos 1990; Irschick and Losos 1998),  
363 suggesting that they have been driven apart by divergent directional selection. The longer  
364 hindlimbs of trunk-ground lizards facilitate running faster on flatter surfaces, whereas the shorter  
365 hindlimbs of trunk-crown lizards are suited for a wider variety of perches (Losos 1990; Losos and

366 Irschick 1996; Irschick and Losos 1998). Strong directional selection acting only on limb length  
367 could reduce its genetic correlations with other traits; however, it is also likely that correlational  
368 selection has played a role. The evolution of trunk-ground anoles from a hypothetical trunk-  
369 crown ancestor would require evolution of longer legs without a concomitant increase in the  
370 pelvis, which may lead to negative correlational selection to decouple the two traits. In contrast,  
371 correlational selection might favor a positive correlation between the two traits in trunk-crown  
372 anoles, perhaps because a matching limb and pelvic morphology would facilitate agility on  
373 branches.

374         Differences in hindlimb length between trunk-crown and trunk-ground ecomorphs are  
375 apparent at hatching and appear to emerge mostly via changes in developmental patterning early  
376 in embryonic development rather than differences in growth (Sanger et al. 2012). The  
377 developmental genetic networks underlying limb growth and development are well understood  
378 (Rabinowitz and Vokes 2012), and comparative genomic evidence indicates that genes expressed  
379 in these networks experienced enhanced positive selection during the radiation of anoles (Tollis  
380 et al. 2018). Limb-development networks share some genes in common with the network  
381 underlying development of the pelvic girdle (Sears et al. 2015). Therefore, it is likely that  
382 changes in genetic correlations between limb length and pelvis involve evolutionary changes in  
383 the expression of some of these shared genes. Future work should explore remodeling of these  
384 networks to understand the developmental genetic underpinnings of convergent morphological  
385 evolution in anoles.

386         Weaker genetic correlations between limbs and body traits likely facilitated the evolution  
387 of longer hindlimbs in trunk-ground anoles without correlated changes in the rest of the body.  
388 Such genetic decoupling of limbs and body may help explain the remarkable adaptability of the

389 trunk-ground ecomorph. Trunk-ground anoles seem to be especially capable of colonizing new  
390 habitats. Trunk-ground species have successfully colonized the Bahamas and the Virgin Islands  
391 (*A. sagrei* and *A. cristatellus*, respectively) and have become established invaders in a number of  
392 locations following introduction by humans (Kolbe et al. 2004; Eales et al. 2008; Losos 2009).  
393 Trunk-ground anoles also have greater species richness within islands (Losos 2009), in part  
394 because they have radiated into ecologically distinct macrohabitats (Glor et al. 2003). Some of  
395 this adaptability is likely due to rapid evolution in limb length, such as has been demonstrated in  
396 experimental populations of *A. sagrei* (Losos et al. 1997, 2001; Kolbe et al. 2012). Although  
397 comparable studies have not been conducted using trunk-crown ecomorphs, their stronger genetic  
398 correlations between limb traits and body traits suggest that rapid, independent evolution of limb  
399 length would not be as likely in trunk-crown species.

400         The genetic correlations between pelvis and limb length in the single grass-bush anole we  
401 examined resemble those of trunk-ground anoles, suggesting either similar selection or common  
402 ancestry, or a combination of the two. Grass-bush anoles have long hindlimbs relative to their  
403 body width, suggesting that a combination of directional and correlational selection may have  
404 reduced these correlations. However, *A. pulchellus* is likely to have evolved from a trunk-ground  
405 ancestor (Poe et al. 2017), which suggests that both this species and the closely related *A.*  
406 *cristatellus* may have inherited weakened genetic correlations between pelvis and limbs from a  
407 common ancestor. In other respects, however, the genetic correlation structure of *A. pulchellus* is  
408 dissimilar to that of *A. cristatellus*. In contrast to *A. cristatellus*, *A. pulchellus* appears to have  
409 attained differences between the lengths of its hindlimbs and forelimbs via a reduction in the  
410 genetic correlations between the two, a feature it shares with the distantly related trunk-ground  
411 lizard *A. lineatopus*.

412

## Conclusion

413 The evolution of **G** in West Indian anoles illustrates how the complex interplay between selection  
414 and history influences genetic architecture. **G** reflects neither an irresistible pattern of constraint  
415 nor an easily adapted phenotype responding quickly to environmental pressures. Patterns of  
416 genetic covariation have potentially influenced the pathways that selection may follow, as  
417 evidenced by evolution along a deeply conserved genetic line of least resistance in this radiation  
418 (McGlothlin et al. 2018). At the same time, as we show here, selection leaves an imprint, if  
419 subtle, upon **G** as species diverge. We did not observe a full-scale overhaul of **G** as ecomorphs  
420 evolved. However, small-scale differences in the elements of **G** involving critical morphological  
421 modules arose predictably between ecomorphs and may have had substantial evolutionary  
422 consequences. Our results emphasize that while genetic constraints may change as adaptation  
423 proceeds, these changes need not be large to facilitate phenotypic diversification. Rather, the  
424 convergent changes we observed in the individual elements of **G**, particularly between the limbs  
425 and the body, demonstrate that consistent selection pressures can alter underlying genetic  
426 constraints in subtle ways that facilitate adaptation and influence future evolutionary potential.

427

428

429

## Acknowledgments

430 We thank Simon Pearish and Michelle Sivilich for managing the lizard colony. Dozens of  
431 undergraduates at the University of Virginia provided animal care and assistance with data  
432 collection; special thanks is due to Margo Adler, Tyler Cassidy, Brian Duggar, Maridel  
433 Fredericksen, Casey Furr, Jessie Handy, Bryan Hendrick, Uma Pendem, Jeff Wright, and



434 Elizabeth Zipperle, Leleña Avila, Chris Feldman, Vince Formica, Tonia Hsieh, Melissa Losos,  
435 Ashli Moore, Liam Revell, and Matt Sanford assisted with field collections. We thank Brooke  
436 Bodensteiner, Vincent Farallo, Kerry Gendreau, Angela Hornsby, and Josef Uyeda for comments  
437 on the manuscript, and Luke Harmon, Gabriel Marroig, Emília Martins, and Liam Revell for  
438 helpful discussions. This work was supported by the National Science Foundation (grant numbers  
439 DEB 0519658 and 0650078 to E.D.B. III and DEB 0519777 and 0722475 to J.B.L.), University  
440 of Virginia, and Virginia Tech. The authors declare that there are no conflicts of interest.

441

442

443

### **Statement of Authorship**

444 J.B.L. and E.D.B. III conceived the study; J.W.M. and J.J.K. contributed to study design; J.W.M.,  
445 J.J.K., J.B.L., and E.D.B. III performed field collections; J.W.M. and E.D.B. III oversaw the  
446 breeding experiment; J.W.M., M.E.K., and H.V.W. collected data; J.W.M. analyzed data; J.W.M.  
447 drafted the manuscript and all authors contributed to the final version of the manuscript.

448

449

450

### **Data and Code Availability**

451 Raw data for estimating **G** matrices are available in a Dryad Data Repository from a previous  
452 publication (<https://datadryad.org/stash/dataset/doi:10.5061/dryad.pt2g084>). All code and  
453 processed data are available at <https://github.com/joelmcg/AnolisG> and will be archived in Dryad  
454 upon manuscript acceptance.

455

456

## Literature Cited

457 Agrawal, A. F., E. D. Brodie, III, and L. H. Rieseberg. 2001. Possible consequences of genes of

458 major effect: transient changes in the **G**-matrix. *Genetica* 112:33-43.

459 Aguirre, J. D., E. Hine, K. McGuigan, and M. W. Blows. 2014. Comparing **G**: multivariate

460 analysis of genetic variation in multiple populations. *Heredity* 112:21-29.

461 Arnold, S. J., R. Bürger, P. A. Hohenlohe, B. C. Ajie, and A. G. Jones. 2008. Understanding the

462 evolution and stability of the **G**-matrix. *Evolution* 62:2451-2461.

463 Arnold, S. J., M. E. Pfrender, and A. G. Jones. 2001. The adaptive landscape as a conceptual

464 bridge between micro- and macroevolution. *Genetica* 112-113:9-32.

465 Bégin, M., and D. A. Roff. 2003. The constancy of the **G** matrix through species divergence and

466 the effects of quantitative genetic constraints on phenotypic evolution: a case study in

467 crickets. *Evolution* 57:1107-1120.

468 —. 2004. From micro- to macroevolution through quantitative genetic variation: positive

469 evidence from field crickets. *Evolution* 58:2287-2304.

470 Beuttell, K., and J. B. Losos. 1999. Ecological morphology of Caribbean anoles. *Herpetological*

471 *Monographs*:1-28.

472 Björklund, M., A. Husby, and L. Gustafsson. 2013. Rapid and unpredictable changes of the **G**-

473 matrix in a natural bird population over 25 years. *Journal of Evolutionary Biology* 26:1-

474 13.

475 Blomberg, S. P., T. Garland, and A. R. Ives. 2003. Testing for phylogenetic signal in comparative

476 data: Behavioral traits are more labile. *Evolution* 57:717-745.

- 477 Blows, M. W., and A. A. Hoffmann. 2005. A reassessment of genetic limits to evolutionary  
478 change. *Ecology* 86:1371-1384.
- 479 Bolstad, G. H., T. F. Hansen, C. Pelabon, M. Falahati-Anbaran, R. Perez-Barrales, and W. S.  
480 Armbruster. 2014. Genetic constraints predict evolutionary divergence in *Dalechampia*  
481 blossoms. *Philosophical Transactions of the Royal Society B-Biological Sciences* 369.
- 482 Brodie, E. D., III. 1989. Genetic correlations between morphology and antipredator behaviour in  
483 natural populations of the garter snakes *Thamnophis ordinoides*. *Nature* 342:542-543.
- 484 —. 1992. Correlational selection for color pattern and antipredator behavior in the garter snake  
485 *Thamnophis ordinoides*. *Evolution* 46:1284-1298.
- 486 Cano, J. M., A. Laurila, J. Palo, and J. Merilä. 2004. Population differentiation in **G** matrix  
487 structure due to natural selection in *Rana temporaria*. *Evolution* 58:2013-2020.
- 488 Careau, V., M. E. Wolak, P. A. Carter, and T. Garland. 2015. Evolution of the additive genetic  
489 variance-covariance matrix under continuous directional selection on a complex  
490 behavioural phenotype. *Proceedings of the Royal Society B-Biological Sciences* 282.
- 491 Chenoweth, S. F., H. D. Rundle, and M. W. Blows. 2010. The contribution of selection and  
492 genetic constraints to phenotypic divergence. *American Naturalist* 175:186-196.
- 493 Cheverud, J. M. 1984. Quantitative genetics and developmental constraints on evolution by  
494 selection. *Journal of Theoretical Biology* 110:155-171.
- 495 —. 1988. A comparison of genetic and phenotypic correlations. *Evolution* 42:958-968.
- 496 Cheverud, J. M., and G. Marroig. 2007. Comparing covariance matrices: random skewers method  
497 compared to the common principal components model. *Genetics and Molecular Biology*  
498 30:461-469.

- 499 Cox, R. M., C. L. Cox, J. W. McGlothlin, D. C. Card, A. L. Andrew, and T. A. Castoe. 2017.  
500       Hormonally mediated increases in sex-biased gene expression accompany the breakdown  
501       of between-sex genetic correlations in a sexually dimorphic lizard. *American Naturalist*  
502       189:315-332.
- 503 Delph, L. F., J. C. Steven, I. A. Anderson, C. R. Herlihy, and E. D. Brodie, III. 2011. Elimination  
504       of a genetic correlation between the sexes via artificial correlational selection. *Evolution*  
505       65:2872-2880.
- 506 Dobzhansky, T. 1937, *Genetics and the Origin of Species*, Columbia Univ. Press.
- 507 Doroszuk, A., M. W. Wojewodzic, G. Gort, and J. E. Kammenga. 2008. Rapid divergence of  
508       genetic variance-covariance matrix within a natural population. *American Naturalist*  
509       171:291-304.
- 510 Eales, J., R. S. Thorpe, and A. Malhotra. 2008. Weak founder effect signal in a recent  
511       introduction of Caribbean *Anolis*. *Molecular Ecology* 17:1416-1426.
- 512 Eroukhmanoff, F., and E. I. Svensson. 2011. Evolution and stability of the **G**-matrix during the  
513       colonization of a novel environment. *Journal of Evolutionary Biology* 24:1363-1373.
- 514 Falconer, D. S., and T. F. C. MacKay. 1996, *Introduction to Quantitative Genetics*. Harlow,  
515       England, Prentice Hall.
- 516 Gilmour, A. R., B. J. Gogel, B. R. Cullis, and R. Thompson. 2009, *ASReml User Guide Release*  
517       3.0. Hemel Hempstead, UK, VSN International Ltd.
- 518 Glor, R. E., J. J. Kolbe, R. Powell, A. Larson, and J. B. Losos. 2003. Phylogenetic analysis of  
519       ecological and morphological diversification in Hispaniolan trunk-ground anoles (*Anolis*  
520       *cybotes* group). *Evolution* 57:2383-2397.

- 521 Grant, P. R., and B. R. Grant. 1995. Predicting microevolutionary responses to directional  
522 selection on heritable variation. *Evolution* 49:241-251.
- 523 Hadfield, J. D., A. Nutall, D. Osorio, and I. P. F. Owens. 2007. Testing the phenotypic gambit:  
524 phenotypic, genetic and environmental correlations of colour. *Journal of Evolutionary*  
525 *Biology* 20:549-557.
- 526 Hansen, T. F., and D. Houle. 2008. Measuring and comparing evolvability and constraint in  
527 multivariate characters. *Journal of Evolutionary Biology* 21:1201-1219.
- 528 Harmon, L. J., and R. E. Glor. 2010. Poor statistical performance of the Mantel test in  
529 phylogenetic comparative analyses. *Evolution* 64:2173-2178.
- 530 Harmon, L. J., J. J. Kolbe, J. M. Cheverud, and J. B. Losos. 2005. Convergence and the  
531 multidimensional niche. *Evolution* 59:409-421.
- 532 Hine, E., S. F. Chenoweth, H. D. Rundle, and M. W. Blows. 2009. Characterizing the evolution  
533 of genetic variance using genetic covariance tensors. *Philosophical Transactions of the*  
534 *Royal Society B-Biological Sciences* 364:1567-1578.
- 535 Houle, D., G. H. Bolstad, K. van der Linde, and T. F. Hansen. 2017. Mutation predicts 40 million  
536 years of fly wing evolution. *Nature* 548:447-+.
- 537 Houle, D., and K. Meyer. 2015. Estimating sampling error of evolutionary statistics based on  
538 genetic covariance matrices using maximum likelihood. *Journal of Evolutionary Biology*  
539 28:1542-1549.
- 540 Irschick, D. J., and J. B. Losos. 1998. A comparative analysis of the ecological significance of  
541 maximal locomotor performance in Caribbean Anolis lizards. *Evolution* 52:219-226.

- 542 Jones, A. G., S. J. Arnold, and R. Bürger. 2003. Stability of the **G**-matrix in a population  
543 experiencing pleiotropic mutation, stabilizing selection, and genetic drift. *Evolution*  
544 57:1747-1760.
- 545 —. 2004. Evolution and stability of the **G**-matrix on a landscape with a moving optimum.  
546 *Evolution* 58:1639-1654.
- 547 Jones, A. G., R. Bürger, and S. J. Arnold. 2014. Epistasis and natural selection shape the  
548 mutational architecture of complex traits. *Nature Communications* 5.
- 549 Jones, A. G., R. Bürger, S. J. Arnold, P. A. Hohenlohe, and J. C. Uyeda. 2012. The effects of  
550 stochastic and episodic movement of the optimum on the evolution of the **G**-matrix and  
551 the response of the trait mean to selection. *Journal of Evolutionary Biology* 25:2210-  
552 2231.
- 553 Kim, S. 2015. ppcor: An R package for a fast calculation to semi-partial correlation coefficients.  
554 *Commun Stat Appl Methods* 22:665-674.
- 555 Kolbe, J. J., R. E. Glor, L. R. G. Schettino, A. C. Lara, A. Larson, and J. B. Losos. 2004. Genetic  
556 variation increases during biological invasion by a Cuban lizard. *Nature* 431:177-181.
- 557 Kolbe, J. J., M. Leal, T. W. Schoener, D. A. Spiller, and J. B. Losos. 2012. Founder effects  
558 persist despite adaptive differentiation: a field experiment with lizards. *Science* 335:1086-  
559 1089.
- 560 Kolbe, J. J., L. J. Revell, B. Szekely, E. D. Brodie, and J. B. Losos. 2011. Convergent evolution  
561 of phenotypic integration and Its alignment with morphological diversification in  
562 Caribbean *Anolis* ecomorphs. *Evolution* 65:3608-3624.
- 563 Lande, R. 1979. Quantitative genetic analysis of multivariate evolution, applied to brain:body  
564 size allometry. *Evolution* 33:402-416.

- 565 —. 1980. The genetic covariance between characters maintained by pleiotropic mutations.  
566 *Genetics* 94:203-215.
- 567 Losos, J. B. 1990. Ecomorphology, performance capability, and scaling of West Indian *Anolis*  
568 lizards: an evolutionary analysis. *Ecological Monographs* 60:369-388.
- 569 —. 1994. Integrative approaches to evolutionary ecology: *Anolis* lizards as model systems.  
570 *Annual Review of Ecology and Systematics* 25:467-493.
- 571 —. 2009. *Lizards in an Evolutionary Tree: Ecology and Adaptive Radiation of Anoles*. Berkeley,  
572 Univ. of California Press.
- 573 —. 2011. Convergence, adaptation, and constraint. *Evolution* 65:1827-1840.
- 574 Losos, J. B., and D. J. Irschick. 1996. The effect of perch diameter on escape behaviour of *Anolis*  
575 lizards: laboratory predictions and field tests. *Animal Behaviour* 51:593-602.
- 576 Losos, J. B., T. R. Jackman, A. Larson, K. de Queiroz, and L. Rodríguez-Schettino. 1998.  
577 Contingency and determinism in replicated adaptive radiations of island lizards. *Science*  
578 279:2115-2118.
- 579 Losos, J. B., T. W. Schoener, K. I. Warheit, and D. Creer. 2001. Experimental studies of adaptive  
580 differentiation in Bahamian *Anolis* lizards. *Genetica* 112:399-415.
- 581 Losos, J. B., and B. Sinervo. 1989. The effects of morphology and perch diameter on sprint  
582 performance of *Anolis* lizards. *Journal of Experimental Biology* 145:23-30.
- 583 Losos, J. B., K. I. Warheit, and T. W. Schoener. 1997. Adaptive differentiation following  
584 experimental island colonization in *Anolis* lizards. *Nature* 387:70-73.
- 585 Mahler, D. L., T. Ingram, L. J. Revell, and J. B. Losos. 2013. Exceptional convergence on the  
586 macroevolutionary landscape in island lizard radiations. *Science* 341:292-295.

- 587 Marroig, G., and J. M. Cheverud. 2001. A comparison of phenotypic variation and covariation  
588 patterns and the role of phylogeny. Ecology, and ontogeny during cranial evolution of  
589 new world monkeys. *Evolution* 55:2576-2600.
- 590 Martins, E. P., and T. F. Hansen. 1997. Phylogenies and the comparative method: a general  
591 approach to incorporating phylogenetic information into the analysis of interspecific data.  
592 *American Naturalist* 149:646-667.
- 593 McGlothlin, J. W., M. E. Kobiela, H. V. Wright, D. L. Mahler, J. J. Kolbe, J. B. Losos, and E. D.  
594 Brodie, III. 2018. Adaptive radiation along a deeply conserved genetic line of least  
595 resistance in *Anolis* lizards. *Evolution Letters* 2:310-322.
- 596 McGlothlin, J. W., P. G. Parker, V. Nolan, Jr., and E. D. Ketterson. 2005. Correlational selection  
597 leads to genetic integration of body size and an attractive plumage trait in dark-eyed  
598 juncos. *Evolution* 59:658-671.
- 599 McGuigan, K. 2006. Studying phenotypic evolution using multivariate quantitative genetics.  
600 *Molecular Ecology* 15:883-896.
- 601 McGuigan, K., S. F. Chenoweth, and M. W. Blows. 2005. Phenotypic divergence along lines of  
602 genetic variance. *American Naturalist* 165:32-43.
- 603 Melo, D., G. Garcia, A. Hubbe, A. P. Assis, and G. Marroig. 2015. EvolQG - An R package for  
604 evolutionary quantitative genetics. *F1000Res* 4:925.
- 605 Merilä, J., and M. Björklund. 2004. Phenotypic integration as a constraint and adaptation, Pages  
606 107-129 in M. Pigliucci, and K. Preston, eds. *Phenotypic Integration: Studying the*  
607 *Ecology and Evolution of Complex Phenotypes*. Oxford, Oxford Univ. Press.
- 608 Paradis, E., J. Claude, and K. Strimmer. 2004. APE: Analyses of Phylogenetics and Evolution in  
609 R language. *Bioinformatics* 20:289-290.



- 610 Phillips, P. C., and S. J. Arnold. 1989. Visualizing multivariate selection. *Evolution* 43:1209-  
611 1222.
- 612 Poe, S., A. Nieto-Montes de Oca, O. Torres-Carvajal, K. de Queiroz, J. A. Velasco, B. Truett, L.  
613 N. Gray et al. 2017. A phylogenetic, biogeographic, and taxonomic study of all extant  
614 species of *Anolis* (Squamata; Iguanidae). *Systematic Biology* 66:663-697.
- 615 R Core Team. 2019. R: A language and environment for statistical computing. . Vienna, Austria,  
616 R Foundation for Statistical Computing.
- 617 Rabinowitz, A. H., and S. A. Vokes. 2012. Integration of the transcriptional networks regulating  
618 limb morphogenesis. *Developmental Biology* 368:165-180.
- 619 Revell, L. J. 2007. The **G** matrix under fluctuating correlational mutation and selection.  
620 *Evolution* 61:1857-1872.
- 621 —. 2012. phytools: an R package for phylogenetic comparative biology (and other things).  
622 *Methods in Ecology and Evolution* 3:217-223.
- 623 Revell, L. J., D. L. Mahler, J. R. Sweeney, M. Sobotka, V. E. Fancher, and J. B. Losos. 2010.  
624 Nonlinear selection and the evolution of variances and covariances for continuous  
625 characters in an anole. *Journal of Evolutionary Biology* 23:407-421.
- 626 Roff, D. A. 1997, *Evolutionary Quantitative Genetics*. New York, Chapman & Hall.
- 627 Roff, D. A., and D. J. Fairbairn. 2012. A test of the hypothesis that correlational selection  
628 generates genetic correlations. *Evolution* 66:2953-2960.
- 629 Sanger, T. J., L. J. Revell, J. J. Gibson-Brown, and J. B. Losos. 2012. Repeated modification of  
630 early limb morphogenesis programmes underlies the convergence of relative limb length  
631 in *Anolis* lizards. *Proceedings of the Royal Society B-Biological Sciences* 279:739-748.

- 632 Schluter, D. 1996. Adaptive radiation along genetic lines of least resistance. *Evolution* 50:1766-  
633 1774.
- 634 Sears, K. E., T. D. Capellini, and R. Diogo. 2015. On the serial homology of the pectoral and  
635 pelvic girdles of tetrapods. *Evolution* 69:2543-2555.
- 636 Stepan, S. J., P. C. Phillips, and D. Houle. 2002. Comparative quantitative genetics: evolution of  
637 the **G** matrix. *Trends in Ecology & Evolution* 17:320-327.
- 638 Steven, J. C., I. A. Anderson, E. D. Brodie III, and L. F. Delph. 2020. Rapid reversal of a  
639 potentially constraining genetic covariance between leaf and flower traits in *Silene*  
640 *latifolia*. *Ecol Evol* 10:569-578.
- 641 Tollis, M., E. D. Hutchins, J. Stapley, S. M. Rupp, W. L. Eckalbar, I. Maayan, E. Lasku et al.  
642 2018. Comparative genomics reveals accelerated evolution in conserved pathways during  
643 the diversification of anole lizards. *Genome Biology and Evolution* 10:489-506.
- 644 Turelli, M. 1988. Phenotypic evolution, constant covariances, and the maintenance of additive  
645 variance. *Evolution* 42:1342-1347.
- 646 Walsh, B., and M. W. Blows. 2009. Abundant genetic variation plus strong selection =  
647 multivariate genetic constraints: a geometric view of adaptation. *Annual Review of*  
648 *Ecology Evolution and Systematics* 40:41-59.
- 649 Walter, G. M., J. D. Aguirre, M. W. Blows, and D. Ortiz-Barrientos. 2018. Evolution of genetic  
650 variance during adaptive radiation. *American Naturalist* 191:E108-E128.
- 651 Williams, E. E. 1972. The origin of faunas. Evolution of lizard congeners in a complex island  
652 fauna: a trial analysis. *Evolutionary Biology* 6:47-89.
- 653 Wood, S. 2012. mgcv: Mixed GAM Computation Vehicle with GCV/AIC/REML smoothness  
654 estimation.

655 Zheng, Y. C., and J. J. Wiens. 2016. Combining phylogenomic and supermatrix approaches, and  
656 a time-calibrated phylogeny for squamate reptiles (lizards and snakes) based on 52 genes  
657 and 4162 species. *Molecular Phylogenetics and Evolution* 94:537-547.

# Appendix

## Supplemental Tables

**Table A1:** **G** matrices and matrices of heritabilities ( $h^2$ , diagonal) and genetic correlations ( $r_g$ , off-diagonal) for seven *Anolis* species. Approximate standard errors for are shown below each matrix. **G** matrices and standard errors are reprinted from McGlothlin et al. (2018). Although we did not conduct formal likelihood-ratio tests, parameters that exceeded their standard errors by a factor of two are shown in bold, which provides a guide to statistical significance. Traits are abbreviated as follows: JL = jaw length, HW = head width, PECT = pectoral width, PELV = pelvic width, HUM = humerus, UL = ulna, FEM = femur, and TIB = tibia. All traits were natural-log transformed and size-corrected for analysis.

*Anolis cristatellus* (Trunk-ground, Puerto Rico)

**G** ( $\times 10^{-3}$ )

|      | JL          | HW          | PECT         | PELV         | HUM          | UL           | FEM         | TIB         |
|------|-------------|-------------|--------------|--------------|--------------|--------------|-------------|-------------|
| JL   | <b>.329</b> |             |              |              |              |              |             |             |
| HW   | <b>.094</b> | <b>.449</b> |              |              |              |              |             |             |
| PECT | -.083       | <b>.349</b> | <b>1.426</b> |              |              |              |             |             |
| PELV | -.089       | <b>.240</b> | <b>.487</b>  | <b>.546</b>  |              |              |             |             |
| HUM  | <b>.293</b> | .071        | <b>-.371</b> | <b>-.168</b> | <b>1.441</b> |              |             |             |
| UL   | .079        | .075        | -.098        | .017         | <b>1.008</b> | <b>1.087</b> |             |             |
| FEM  | <b>.208</b> | .030        | -.053        | -.051        | <b>.904</b>  | <b>.731</b>  | <b>.809</b> |             |
| TIB  | <b>.268</b> | .009        | <b>-.172</b> | -.081        | <b>.945</b>  | <b>.780</b>  | <b>.783</b> | <b>.949</b> |

SE ( $\times 10^{-3}$ )

|      | JL   | HW   | PECT | PELV | HUM  | UL   | FEM  | TIB  |
|------|------|------|------|------|------|------|------|------|
| JL   | .052 |      |      |      |      |      |      |      |
| HW   | .029 | .048 |      |      |      |      |      |      |
| PECT | .053 | .066 | .170 |      |      |      |      |      |
| PELV | .056 | .049 | .093 | .113 |      |      |      |      |
| HUM  | .057 | .067 | .128 | .090 | .200 |      |      |      |
| UL   | .053 | .063 | .119 | .087 | .144 | .175 |      |      |
| FEM  | .035 | .042 | .077 | .058 | .093 | .085 | .071 |      |
| TIB  | .037 | .043 | .081 | .060 | .096 | .089 | .067 | .076 |

*Anolis cristatellus* (continued)

$h^2/r_g$

|      | JL          | HW          | PECT         | PELV        | HUM         | UL          | FEM         | TIB         |
|------|-------------|-------------|--------------|-------------|-------------|-------------|-------------|-------------|
| JL   | <b>.458</b> |             |              |             |             |             |             |             |
| HW   | <b>.245</b> | <b>.353</b> |              |             |             |             |             |             |
| PECT | -.122       | <b>.435</b> | <b>.306</b>  |             |             |             |             |             |
| PELV | -.210       | <b>.484</b> | <b>.552</b>  | <b>.196</b> |             |             |             |             |
| HUM  | <b>.425</b> | .088        | <b>-.259</b> | -.190       | <b>.231</b> |             |             |             |
| UL   | .132        | .108        | -.078        | .022        | <b>.805</b> | <b>.185</b> |             |             |
| FEM  | <b>.403</b> | .049        | -.049        | -.076       | <b>.837</b> | <b>.779</b> | <b>.482</b> |             |
| TIB  | <b>.480</b> | .014        | <b>-.148</b> | -.113       | <b>.808</b> | <b>.768</b> | <b>.894</b> | <b>.561</b> |

$h^2/r_g$  SE

|      | JL   | HW   | PECT | PELV | HUM  | UL   | FEM  | TIB  |
|------|------|------|------|------|------|------|------|------|
| JL   | .057 |      |      |      |      |      |      |      |
| HW   | .068 | .028 |      |      |      |      |      |      |
| PECT | .079 | .073 | .029 |      |      |      |      |      |
| PELV | .130 | .093 | .092 | .037 |      |      |      |      |
| HUM  | .081 | .082 | .084 | .101 | .028 |      |      |      |
| UL   | .091 | .090 | .094 | .111 | .057 | .027 |      |      |
| FEM  | .066 | .068 | .072 | .087 | .049 | .058 | .025 |      |
| TIB  | .063 | .066 | .069 | .085 | .051 | .057 | .017 | .023 |

*Anolis evermanni* (Trunk-crown, Puerto Rico)

**G** ( $\times 10^{-3}$ )

|      | JL          | HW          | PECT         | PELV        | HUM         | UL           | FEM          | TIB          |
|------|-------------|-------------|--------------|-------------|-------------|--------------|--------------|--------------|
| JL   | <b>.251</b> |             |              |             |             |              |              |              |
| HW   | -.013       | <b>.314</b> |              |             |             |              |              |              |
| PECT | .016        | <b>.411</b> | <b>1.062</b> |             |             |              |              |              |
| PELV | -.017       | <b>.183</b> | <b>.435</b>  | <b>.623</b> |             |              |              |              |
| HUM  | <b>.143</b> | .022        | .051         | .139        | <b>.866</b> |              |              |              |
| UL   | <b>.141</b> | -.026       | .097         | .145        | <b>.884</b> | <b>.971</b>  |              |              |
| FEM  | .070        | .040        | <b>.228</b>  | <b>.279</b> | <b>.850</b> | <b>.922</b>  | <b>1.224</b> |              |
| TIB  | <b>.121</b> | .047        | .178         | <b>.258</b> | <b>.971</b> | <b>1.064</b> | <b>1.427</b> | <b>1.751</b> |

SE ( $\times 10^{-3}$ )

|      | JL   | HW   | PECT | PELV | HUM  | UL   | FEM  | TIB  |
|------|------|------|------|------|------|------|------|------|
| JL   | .029 |      |      |      |      |      |      |      |
| HW   | .027 | .049 |      |      |      |      |      |      |
| PECT | .048 | .069 | .163 |      |      |      |      |      |
| PELV | .040 | .054 | .099 | .146 |      |      |      |      |
| HUM  | .049 | .061 | .110 | .091 | .160 |      |      |      |
| UL   | .049 | .062 | .113 | .093 | .135 | .156 |      |      |
| FEM  | .041 | .054 | .098 | .083 | .108 | .110 | .117 |      |
| TIB  | .048 | .064 | .114 | .097 | .124 | .128 | .125 | .174 |

$h^2/r_g$

|      | JL          | HW          | PECT        | PELV        | HUM         | UL          | FEM         | TIB         |
|------|-------------|-------------|-------------|-------------|-------------|-------------|-------------|-------------|
| JL   | <b>.415</b> |             |             |             |             |             |             |             |
| HW   | -.047       | <b>.244</b> |             |             |             |             |             |             |
| PECT | .031        | <b>.712</b> | <b>.280</b> |             |             |             |             |             |
| PELV | -.043       | <b>.414</b> | <b>.535</b> | <b>.227</b> |             |             |             |             |
| HUM  | <b>.306</b> | .042        | .053        | .189        | <b>.194</b> |             |             |             |
| UL   | <b>.286</b> | -.046       | .096        | .186        | <b>.964</b> | <b>.212</b> |             |             |
| FEM  | .126        | .064        | <b>.200</b> | <b>.319</b> | <b>.825</b> | <b>.846</b> | <b>.599</b> |             |
| TIB  | <b>.182</b> | .064        | .131        | <b>.247</b> | <b>.788</b> | <b>.816</b> | <b>.975</b> | <b>.704</b> |

$h^2/r_g$  SE

|      | JL   | HW   | PECT | PELV | HUM  | UL   | FEM  | TIB  |
|------|------|------|------|------|------|------|------|------|
| JL   | .033 |      |      |      |      |      |      |      |
| HW   | .097 | .032 |      |      |      |      |      |      |
| PECT | .094 | .077 | .035 |      |      |      |      |      |
| PELV | .101 | .108 | .106 | .048 |      |      |      |      |
| HUM  | .096 | .117 | .117 | .122 | .032 |      |      |      |
| UL   | .092 | .113 | .111 | .117 | .044 | .029 |      |      |
| FEM  | .072 | .087 | .083 | .089 | .066 | .053 | .030 |      |
| TIB  | .069 | .085 | .083 | .089 | .071 | .057 | .011 | .034 |

*Anolis grahami* (Trunk-crown, Jamaica)

**G** ( $\times 10^{-3}$ )

|      | JL          | HW          | PECT        | PELV        | HUM          | UL           | FEM         | TIB         |
|------|-------------|-------------|-------------|-------------|--------------|--------------|-------------|-------------|
| JL   | <b>.246</b> |             |             |             |              |              |             |             |
| HW   | <b>.218</b> | <b>.296</b> |             |             |              |              |             |             |
| PECT | .127        | .122        | <b>.351</b> |             |              |              |             |             |
| PELV | <b>.193</b> | .126        | .173        | <b>.704</b> |              |              |             |             |
| HUM  | .152        | .067        | .167        | .264        | <b>1.003</b> |              |             |             |
| UL   | .129        | .131        | .122        | .130        | <b>.856</b>  | <b>1.171</b> |             |             |
| FEM  | <b>.126</b> | -.005       | .081        | .186        | <b>.625</b>  | <b>.559</b>  | <b>.510</b> |             |
| TIB  | <b>.146</b> | .034        | .171        | <b>.269</b> | <b>.732</b>  | <b>.724</b>  | <b>.549</b> | <b>.648</b> |

SE ( $\times 10^{-3}$ )

|      | JL   | HW   | PECT | PELV | HUM  | UL   | FEM  | TIB  |
|------|------|------|------|------|------|------|------|------|
| JL   | .049 |      |      |      |      |      |      |      |
| HW   | .051 | .082 |      |      |      |      |      |      |
| PECT | .064 | .081 | .151 |      |      |      |      |      |
| PELV | .068 | .084 | .113 | .169 |      |      |      |      |
| HUM  | .140 | .186 | .238 | .176 | .465 |      |      |      |
| UL   | .103 | .133 | .177 | .186 | .323 | .405 |      |      |
| FEM  | .052 | .099 | .139 | .111 | .230 | .191 | .170 |      |
| TIB  | .056 | .102 | .145 | .104 | .230 | .181 | .163 | .179 |

$h^2/r_g$

|      | JL          | HW          | PECT        | PELV        | HUM         | UL          | FEM         | TIB         |
|------|-------------|-------------|-------------|-------------|-------------|-------------|-------------|-------------|
| JL   | <b>.421</b> |             |             |             |             |             |             |             |
| HW   | <b>.807</b> | <b>.240</b> |             |             |             |             |             |             |
| PECT | <b>.434</b> | .377        | <b>.133</b> |             |             |             |             |             |
| PELV | <b>.465</b> | .277        | .349        | <b>.277</b> |             |             |             |             |
| HUM  | .307        | .123        | .281        | .315        | <b>.168</b> |             |             |             |
| UL   | .240        | .222        | .191        | .143        | <b>.790</b> | <b>.159</b> |             |             |
| FEM  | <b>.355</b> | -.013       | .191        | .311        | <b>.873</b> | <b>.723</b> | <b>.453</b> |             |
| TIB  | <b>.367</b> | .076        | .358        | <b>.399</b> | <b>.908</b> | <b>.831</b> | <b>.955</b> | <b>.544</b> |

$h^2/r_g$  SE

|      | JL   | HW   | PECT | PELV | HUM  | UL   | FEM  | TIB  |
|------|------|------|------|------|------|------|------|------|
| JL   | .056 |      |      |      |      |      |      |      |
| HW   | .092 | .056 |      |      |      |      |      |      |
| PECT | .190 | .229 | .054 |      |      |      |      |      |
| PELV | .134 | .173 | .210 | .054 |      |      |      |      |
| HUM  | .266 | .341 | .392 | .192 | .072 |      |      |      |
| UL   | .188 | .221 | .281 | .199 | .155 | .050 |      |      |
| FEM  | .136 | .249 | .323 | .171 | .165 | .160 | .122 |      |
| TIB  | .127 | .231 | .289 | .134 | .165 | .124 | .037 | .110 |

*Anolis lineatopus* (Trunk-ground, Jamaica)

**G** ( $\times 10^{-3}$ )

|      | JL          | HW          | PECT        | PELV        | HUM         | UL           | FEM          | TIB         |
|------|-------------|-------------|-------------|-------------|-------------|--------------|--------------|-------------|
| JL   | <b>.442</b> |             |             |             |             |              |              |             |
| HW   | <b>.286</b> | <b>.263</b> |             |             |             |              |              |             |
| PECT | <b>.385</b> | <b>.290</b> | <b>.750</b> |             |             |              |              |             |
| PELV | .193        | .132        | .343        | <b>.916</b> |             |              |              |             |
| HUM  | <b>.321</b> | <b>.240</b> | .223        | -.016       | <b>.968</b> |              |              |             |
| UL   | <b>.412</b> | <b>.297</b> | .308        | -.200       | <b>.942</b> | <b>1.047</b> |              |             |
| FEM  | <b>.423</b> | .180        | <b>.547</b> | .228        | <b>.530</b> | <b>.540</b>  | <b>1.013</b> |             |
| TIB  | <b>.368</b> | .145        | <b>.528</b> | .182        | <b>.464</b> | <b>.495</b>  | <b>.864</b>  | <b>.825</b> |

SE ( $\times 10^{-3}$ )

|      | JL   | HW   | PECT | PELV | HUM  | UL   | FEM  | TIB  |
|------|------|------|------|------|------|------|------|------|
| JL   | .103 |      |      |      |      |      |      |      |
| HW   | .059 | .090 |      |      |      |      |      |      |
| PECT | .101 | .100 | .309 |      |      |      |      |      |
| PELV | .158 | .139 | .254 | .352 |      |      |      |      |
| HUM  | .127 | .103 | .213 | .200 | .291 |      |      |      |
| UL   | .106 | .104 | .186 | .174 | .240 | .270 |      |      |
| FEM  | .168 | .130 | .233 | .256 | .255 | .248 | .346 |      |
| TIB  | .147 | .117 | .212 | .227 | .226 | .222 | .295 | .272 |

$h^2/r_g$

|      | JL          | HW          | PECT        | PELV        | HUM         | UL          | FEM         | TIB         |
|------|-------------|-------------|-------------|-------------|-------------|-------------|-------------|-------------|
| JL   | <b>.536</b> |             |             |             |             |             |             |             |
| HW   | <b>.837</b> | <b>.177</b> |             |             |             |             |             |             |
| PECT | <b>.668</b> | <b>.652</b> | <b>.151</b> |             |             |             |             |             |
| PELV | .303        | .269        | .414        | <b>.253</b> |             |             |             |             |
| HUM  | <b>.491</b> | <b>.475</b> | .262        | -.017       | <b>.161</b> |             |             |             |
| UL   | <b>.605</b> | <b>.566</b> | .348        | -.204       | <b>.936</b> | <b>.169</b> |             |             |
| FEM  | <b>.633</b> | .349        | <b>.627</b> | .237        | <b>.535</b> | <b>.525</b> | <b>.645</b> |             |
| TIB  | <b>.610</b> | .311        | <b>.672</b> | .209        | <b>.519</b> | <b>.533</b> | <b>.945</b> | <b>.587</b> |

$h^2/r_g$  SE

|      | JL   | HW   | PECT | PELV | HUM  | UL   | FEM  | TIB  |
|------|------|------|------|------|------|------|------|------|
| JL   | .089 |      |      |      |      |      |      |      |
| HW   | .114 | .056 |      |      |      |      |      |      |
| PECT | .158 | .206 | .059 |      |      |      |      |      |
| PELV | .217 | .265 | .263 | .087 |      |      |      |      |
| HUM  | .167 | .196 | .251 | .223 | .044 |      |      |      |
| UL   | .118 | .178 | .223 | .177 | .071 | .040 |      |      |
| FEM  | .143 | .237 | .202 | .232 | .201 | .196 | .155 |      |
| TIB  | .146 | .238 | .188 | .233 | .206 | .196 | .029 | .143 |



*Anolis pulchellus* (Grass-bush, Puerto Rico)

**G** ( $\times 10^{-3}$ )

|      | JL          | HW          | PECT        | PELV        | HUM         | UL          | FEM         | TIB         |
|------|-------------|-------------|-------------|-------------|-------------|-------------|-------------|-------------|
| JL   | .084        |             |             |             |             |             |             |             |
| HW   | <b>.080</b> | <b>.157</b> |             |             |             |             |             |             |
| PECT | <b>.222</b> | <b>.215</b> | <b>.895</b> |             |             |             |             |             |
| PELV | .070        | .065        | .300        | <b>.766</b> |             |             |             |             |
| HUM  | <b>.148</b> | .040        | .153        | -.036       | <b>.745</b> |             |             |             |
| UL   | <b>.180</b> | .080        | .214        | -.152       | <b>.773</b> | <b>.982</b> |             |             |
| FEM  | .092        | .040        | .156        | .126        | <b>.475</b> | <b>.524</b> | <b>.701</b> |             |
| TIB  | .089        | .030        | .136        | .134        | <b>.403</b> | <b>.524</b> | <b>.648</b> | <b>.723</b> |

SE ( $\times 10^{-3}$ )

|      | JL   | HW   | PECT | PELV | HUM  | UL   | FEM  | TIB  |
|------|------|------|------|------|------|------|------|------|
| JL   | .050 |      |      |      |      |      |      |      |
| HW   | .040 | .059 |      |      |      |      |      |      |
| PECT | .075 | .070 | .268 |      |      |      |      |      |
| PELV | .066 | .061 | .192 | .244 |      |      |      |      |
| HUM  | .072 | .068 | .163 | .127 | .204 |      |      |      |
| UL   | .082 | .076 | .155 | .145 | .197 | .254 |      |      |
| FEM  | .054 | .053 | .110 | .083 | .133 | .118 | .156 |      |
| TIB  | .054 | .045 | .087 | .082 | .141 | .143 | .148 | .168 |

$h^2/r_g$

|      | JL          | HW          | PECT        | PELV        | HUM         | UL          | FEM         | TIB         |
|------|-------------|-------------|-------------|-------------|-------------|-------------|-------------|-------------|
| JL   | .076        |             |             |             |             |             |             |             |
| HW   | <b>.701</b> | <b>.124</b> |             |             |             |             |             |             |
| PECT | <b>.810</b> | <b>.574</b> | <b>.211</b> |             |             |             |             |             |
| PELV | .276        | .187        | .363        | <b>.184</b> |             |             |             |             |
| HUM  | .594        | .118        | .188        | -.047       | <b>.106</b> |             |             |             |
| UL   | <b>.629</b> | .204        | .228        | -.175       | <b>.905</b> | <b>.116</b> |             |             |
| FEM  | .382        | .122        | .196        | .172        | <b>.658</b> | <b>.632</b> | <b>.420</b> |             |
| TIB  | .362        | .090        | .170        | .181        | <b>.549</b> | <b>.622</b> | <b>.911</b> | <b>.476</b> |

$h^2/r_g$  SE

|      | JL   | HW   | PECT | PELV | HUM  | UL   | FEM  | TIB  |
|------|------|------|------|------|------|------|------|------|
| JL   | .044 |      |      |      |      |      |      |      |
| HW   | .218 | .044 |      |      |      |      |      |      |
| PECT | .237 | .153 | .057 |      |      |      |      |      |
| PELV | .259 | .176 | .191 | .054 |      |      |      |      |
| HUM  | .299 | .201 | .196 | .167 | .027 |      |      |      |
| UL   | .295 | .192 | .164 | .160 | .066 | .028 |      |      |
| FEM  | .211 | .158 | .134 | .113 | .127 | .113 | .074 |      |
| TIB  | .214 | .134 | .108 | .112 | .159 | .130 | .038 | .086 |

*Anolis sagrei* (Trunk-ground, Bahamas)

**G** ( $\times 10^{-3}$ )

|      | JL          | HW           | PECT        | PELV        | HUM         | UL          | FEM         | TIB         |
|------|-------------|--------------|-------------|-------------|-------------|-------------|-------------|-------------|
| JL   | <b>.292</b> |              |             |             |             |             |             |             |
| HW   | <b>.112</b> | <b>.302</b>  |             |             |             |             |             |             |
| PECT | -.002       | <b>.166</b>  | <b>.286</b> |             |             |             |             |             |
| PELV | -.077       | -.018        | .035        | <b>.463</b> |             |             |             |             |
| HUM  | <b>.156</b> | -.073        | .027        | -.109       | <b>.603</b> |             |             |             |
| UL   | .027        | <b>-.142</b> | -.047       | .082        | <b>.462</b> | <b>.646</b> |             |             |
| FEM  | <b>.192</b> | -.033        | -.027       | -.011       | <b>.409</b> | <b>.315</b> | <b>.368</b> |             |
| TIB  | <b>.177</b> | <b>-.111</b> | -.036       | -.003       | <b>.527</b> | <b>.507</b> | <b>.434</b> | <b>.606</b> |

SE ( $\times 10^{-3}$ )

|      | JL   | HW   | PECT | PELV | HUM  | UL   | FEM  | TIB  |
|------|------|------|------|------|------|------|------|------|
| JL   | .023 |      |      |      |      |      |      |      |
| HW   | .021 | .033 |      |      |      |      |      |      |
| PECT | .024 | .030 | .048 |      |      |      |      |      |
| PELV | .050 | .055 | .043 | .073 |      |      |      |      |
| HUM  | .035 | .050 | .050 | .068 | .092 |      |      |      |
| UL   | .037 | .044 | .053 | .062 | .080 | .116 |      |      |
| FEM  | .024 | .037 | .042 | .041 | .051 | .051 | .054 |      |
| TIB  | .026 | .044 | .051 | .042 | .058 | .061 | .056 | .073 |

$h^2/r_g$

|      | JL          | HW           | PECT        | PELV        | HUM         | UL          | FEM         | TIB         |
|------|-------------|--------------|-------------|-------------|-------------|-------------|-------------|-------------|
| JL   | <b>.469</b> |              |             |             |             |             |             |             |
| HW   | <b>.377</b> | <b>.269</b>  |             |             |             |             |             |             |
| PECT | -.007       | <b>.566</b>  | <b>.127</b> |             |             |             |             |             |
| PELV | -.211       | -.049        | .095        | <b>.147</b> |             |             |             |             |
| HUM  | <b>.372</b> | -.171        | .065        | -.206       | <b>.133</b> |             |             |             |
| UL   | .063        | <b>-.321</b> | -.110       | .149        | <b>.740</b> | <b>.130</b> |             |             |
| FEM  | <b>.585</b> | -.100        | -.085       | -.027       | <b>.869</b> | <b>.647</b> | <b>.270</b> |             |
| TIB  | <b>.421</b> | <b>-.259</b> | -.087       | -.006       | <b>.873</b> | <b>.811</b> | <b>.919</b> | <b>.449</b> |

$h^2/r_g$  SE

|      | JL   | HW   | PECT | PELV | HUM  | UL   | FEM  | TIB  |
|------|------|------|------|------|------|------|------|------|
| JL   | .023 |      |      |      |      |      |      |      |
| HW   | .059 | .024 |      |      |      |      |      |      |
| PECT | .087 | .083 | .020 |      |      |      |      |      |
| PELV | .134 | .146 | .114 | .021 |      |      |      |      |
| HUM  | .077 | .116 | .118 | .126 | .019 |      |      |      |
| UL   | .084 | .097 | .123 | .112 | .069 | .022 |      |      |
| FEM  | .059 | .112 | .131 | .097 | .055 | .083 | .034 |      |
| TIB  | .054 | .097 | .122 | .084 | .048 | .060 | .026 | .041 |

*Anolis smaragdinus* (Trunk-crown, Bahamas)

**G** ( $\times 10^{-3}$ )

|      | JL          | HW    | PECT        | PELV        | HUM         | UL          | FEM         | TIB         |
|------|-------------|-------|-------------|-------------|-------------|-------------|-------------|-------------|
| JL   | <b>.348</b> |       |             |             |             |             |             |             |
| HW   | .054        | .161  |             |             |             |             |             |             |
| PECT | .251        | .065  | <b>.830</b> |             |             |             |             |             |
| PELV | .102        | -.002 | <b>.442</b> | <b>.560</b> |             |             |             |             |
| HUM  | <b>.268</b> | .151  | .130        | .122        | .395        |             |             |             |
| UL   | <b>.238</b> | .094  | .249        | .300        | .331        | .452        |             |             |
| FEM  | .205        | .061  | .136        | .115        | .285        | .287        | <b>.344</b> |             |
| TIB  | .296        | .008  | .221        | .278        | <b>.351</b> | <b>.423</b> | <b>.420</b> | <b>.609</b> |

**SE** ( $\times 10^{-3}$ )

|      | JL   | HW   | PECT | PELV | HUM  | UL   | FEM  | TIB  |
|------|------|------|------|------|------|------|------|------|
| JL   | .129 |      |      |      |      |      |      |      |
| HW   | .091 | .139 |      |      |      |      |      |      |
| PECT | .171 | .174 | .413 |      |      |      |      |      |
| PELV | .072 | .068 | .144 | .142 |      |      |      |      |
| HUM  | .130 | .093 | .163 | .122 | .280 |      |      |      |
| UL   | .098 | .134 | .176 | .175 | .181 | .286 |      |      |
| FEM  | .114 | .085 | .184 | .127 | .149 | .149 | .165 |      |
| TIB  | .125 | .072 | .205 | .141 | .120 | .132 | .158 | .197 |

$h^2/r_g$

|      | JL          | HW    | PECT        | PELV        | HUM         | UL          | FEM         | TIB         |
|------|-------------|-------|-------------|-------------|-------------|-------------|-------------|-------------|
| JL   | <b>.455</b> |       |             |             |             |             |             |             |
| HW   | .227        | .121  |             |             |             |             |             |             |
| PECT | .468        | .176  | <b>.254</b> |             |             |             |             |             |
| PELV | .230        | -.007 | <b>.648</b> | <b>.251</b> |             |             |             |             |
| HUM  | <b>.722</b> | .600  | .228        | .259        | .100        |             |             |             |
| UL   | <b>.601</b> | .348  | .406        | .596        | <b>.783</b> | .090        |             |             |
| FEM  | <b>.592</b> | .257  | .255        | .262        | <b>.773</b> | <b>.728</b> | <b>.283</b> |             |
| TIB  | <b>.644</b> | .025  | .311        | <b>.477</b> | <b>.717</b> | <b>.806</b> | <b>.919</b> | <b>.454</b> |

$h^2/r_g$  SE

|      | JL   | HW   | PECT | PELV | HUM  | UL   | FEM  | TIB  |
|------|------|------|------|------|------|------|------|------|
| JL   | .137 |      |      |      |      |      |      |      |
| HW   | .353 | .101 |      |      |      |      |      |      |
| PECT | .248 | .450 | .116 |      |      |      |      |      |
| PELV | .151 | .254 | .179 | .053 |      |      |      |      |
| HUM  | .298 | .421 | .302 | .261 | .068 |      |      |      |
| UL   | .235 | .481 | .296 | .306 | .290 | .055 |      |      |
| FEM  | .207 | .348 | .337 | .274 | .307 | .311 | .122 |      |
| TIB  | .154 | .223 | .279 | .205 | .269 | .243 | .094 | .118 |

**Table A2:** Random skewers correlations ( $r_{RS}$ ) for each species pair. Point estimates, REML-MVN estimates, and 95% confidence intervals are shown. Point estimates occasionally lie outside the REML-MVN confidence interval because incorporating estimation error from two **G** matrices lead to negatively skewed distributions.

| species 1 | species 2 | $r_{RS}$ | REML-MVN | $r_{RS}$ | 2.5% | 97.5% |
|-----------|-----------|----------|----------|----------|------|-------|
| CRIS      | EVER      | .89      |          | .86      | .80  | .91   |
| CRIS      | GRAH      | .84      |          | .74      | .59  | .84   |
| CRIS      | LINE      | .78      |          | .70      | .55  | .81   |
| CRIS      | PULC      | .87      |          | .81      | .71  | .88   |
| CRIS      | SAGR      | .88      |          | .85      | .79  | .89   |
| CRIS      | SMAR      | .81      |          | .66      | .43  | .82   |
| EVER      | GRAH      | .83      |          | .74      | .60  | .84   |
| EVER      | LINE      | .81      |          | .73      | .55  | .83   |
| EVER      | PULC      | .90      |          | .84      | .74  | .91   |
| EVER      | SAGR      | .84      |          | .81      | .75  | .87   |
| EVER      | SMAR      | .82      |          | .68      | .47  | .81   |
| GRAH      | LINE      | .85      |          | .70      | .52  | .83   |
| GRAH      | PULC      | .88      |          | .75      | .60  | .86   |
| GRAH      | SAGR      | .87      |          | .76      | .62  | .86   |
| GRAH      | SMAR      | .79      |          | .61      | .38  | .77   |
| LINE      | PULC      | .92      |          | .79      | .64  | .89   |
| LINE      | SAGR      | .76      |          | .67      | .52  | .78   |
| LINE      | SMAR      | .81      |          | .63      | .39  | .79   |
| PULC      | SAGR      | .82      |          | .76      | .66  | .83   |
| PULC      | SMAR      | .84      |          | .66      | .44  | .82   |
| SAGR      | SMAR      | .76      |          | .63      | .42  | .77   |

**Table A3:** Estimates of phylogenetic signal (Blomberg's  $K$ ) for all genetic variances and correlations. Point estimates, REML-MVN estimates, and 95% confidence intervals are shown. All estimates of  $K$  were significantly different from 0 and indistinguishable from 1.

Variations

| Trait | $K$  | REML-MVN $K$ | 2.5% | 97.5% |
|-------|------|--------------|------|-------|
| JL    | .81  | .86          | .65  | 1.11  |
| HW    | .69  | .77          | .61  | 1.05  |
| PECT  | 1.16 | 1.13         | .79  | 1.53  |
| PELV  | .90  | .90          | .69  | 1.18  |
| RAD   | .87  | .90          | .69  | 1.20  |
| UL    | 1.15 | 1.03         | .77  | 1.31  |
| FEM   | .99  | 1.00         | .83  | 1.31  |
| TIB   | .90  | .91          | .77  | 1.13  |

Correlations

| Trait 1 | Trait 2 | $K$  | REML-MVN $K$ | 2.5% | 97.5% |
|---------|---------|------|--------------|------|-------|
| JL      | HW      | .92  | .96          | .74  | 1.26  |
| JL      | PECT    | .71  | .76          | .64  | 1.00  |
| JL      | PELV    | .88  | .91          | .67  | 1.25  |
| JL      | HUM     | .91  | .93          | .69  | 1.20  |
| JL      | UL      | .78  | .84          | .67  | 1.12  |
| JL      | FEM     | 1.04 | 1.00         | .73  | 1.32  |
| JL      | TIB     | .95  | .92          | .73  | 1.17  |
| HW      | PECT    | .97  | .97          | .74  | 1.19  |
| HW      | PELV    | 1.04 | 1.01         | .71  | 1.39  |
| HW      | HUM     | 1.04 | 1.01         | .82  | 1.20  |
| HW      | UL      | .97  | .99          | .84  | 1.14  |
| HW      | FEM     | .91  | .97          | .78  | 1.20  |
| HW      | TIB     | .97  | .97          | .82  | 1.16  |
| PECT    | PELV    | 1.02 | .98          | .74  | 1.30  |
| PECT    | HUM     | .85  | .92          | .65  | 1.30  |
| PECT    | UL      | .92  | .94          | .71  | 1.19  |
| PECT    | FEM     | .91  | .95          | .77  | 1.18  |
| PECT    | TIB     | 1.02 | 1.01         | .80  | 1.24  |
| PELV    | HUM     | .90  | .92          | .75  | 1.15  |
| PELV    | UL      | 1.03 | 1.00         | .77  | 1.19  |
| PELV    | FEM     | .81  | .89          | .71  | 1.11  |
| PELV    | TIB     | .93  | .94          | .72  | 1.18  |
| HUM     | UL      | .90  | .99          | .76  | 1.22  |
| HUM     | FEM     | .78  | .92          | .72  | 1.17  |
| HUM     | TIB     | .76  | .87          | .71  | 1.13  |
| UL      | FEM     | .87  | .98          | .71  | 1.31  |
| UL      | TIB     | .80  | .91          | .71  | 1.17  |
| FEM     | TIB     | .79  | .93          | .72  | 1.14  |

**Table A4:** Ecomorph effects given as evolutionary correlations ( $r_e$ ) for all genetic variances and correlations. A positive value indicates that trunk-ground species have a higher value than trunk-crown species. Point estimates, REML-MVN estimates, and 95% confidence intervals are shown. Significant values are indicated with boldface.

Variations

| Trait | $r_e$ | REML-MVN $r_e$ | 2.5% | 97.5% |
|-------|-------|----------------|------|-------|
| JL    | .62   | .48            | -.17 | .88   |
| HW    | .52   | .39            | -.26 | .84   |
| PECT  | .23   | .19            | -.27 | .56   |
| PELV  | .03   | -.04           | -.85 | .58   |
| RAD   | .44   | .36            | -.24 | .78   |
| UL    | .09   | .08            | -.59 | .70   |
| FEM   | .01   | -.02           | -.49 | .34   |
| TIB   | -.35  | -.34           | -.65 | .02   |

Correlations

| Trait 1 | Trait 2 | $r_e$       | REML-MVN $r_e$ | 2.5% | 97.5% |
|---------|---------|-------------|----------------|------|-------|
| JL      | HW      | .28         | .25            | -.13 | .52   |
| JL      | PECT    | -.23        | -.21           | -.60 | .22   |
| JL      | PELV    | <b>-.56</b> | <b>-.49</b>    | -.84 | -.03  |
| JL      | HUM     | .09         | .07            | -.64 | .79   |
| JL      | UL      | -.20        | -.17           | -.64 | .32   |
| JL      | FEM     | <b>.63</b>  | <b>.55</b>     | .05  | .90   |
| JL      | TIB     | .49         | .43            | -.06 | .84   |
| HW      | PECT    | .24         | .11            | -.73 | .57   |
| HW      | PELV    | .03         | .02            | -.60 | .58   |
| HW      | HUM     | -.13        | -.09           | -.63 | .52   |
| HW      | UL      | -.01        | .00            | -.47 | .50   |
| HW      | FEM     | .08         | .04            | -.68 | .64   |
| HW      | TIB     | -.07        | -.09           | -.75 | .48   |
| PECT    | PELV    | -.37        | -.27           | -.79 | .36   |
| PECT    | HUM     | -.55        | -.35           | -.86 | .39   |
| PECT    | UL      | -.44        | -.33           | -.85 | .35   |
| PECT    | FEM     | -.11        | -.10           | -.70 | .42   |
| PECT    | TIB     | -.24        | -.21           | -.68 | .28   |
| PELV    | HUM     | <b>-.96</b> | <b>-.78</b>    | -.98 | -.32  |
| PELV    | UL      | <b>-.68</b> | <b>-.58</b>    | -.89 | -.06  |
| PELV    | FEM     | <b>-.82</b> | <b>-.62</b>    | -.97 | -.01  |
| PELV    | TIB     | <b>-.87</b> | <b>-.74</b>    | -.97 | -.25  |
| HUM     | UL      | -.16        | -.14           | -.82 | .46   |
| HUM     | FEM     | -.37        | -.21           | -.72 | .59   |
| HUM     | TIB     | -.33        | -.21           | -.70 | .59   |
| UL      | FEM     | -.64        | -.35           | -.86 | .41   |
| UL      | TIB     | -.58        | -.37           | -.82 | .45   |
| FEM     | TIB     | -.65        | -.45           | -.94 | .20   |
